# Supplementary material for: Immune Response to Rotavirus and Gluten Sensitivity
Source: J Immunol Res. 2018 Mar 15;2018:9419204. doi: 10.1155/2018/9419204 (PMC5875030; doi:10.1155/2018/9419204)
Supplement: Supplementary 1 — Additional Table 1: genes modulated in NGCS samples versus healthy controls. [file 9419204.f1.xls]

## Sheet: GS Vs HEALTHY no corr  p ALL FC
Probe Set ID	p	FC	Gene Symbol	Gene Title	Representative Public ID
215512_at	2.89311e-05	2.50172	2006-03-01	membrane-associated ring finger (C3HC4) 6, E3 ubiquitin protein ligase	AK000970
207425_s_at	5.49481e-05	1.75222	2009-09-01	septin 9	NM_006640
218075_at	1.06588e-05	1.53612	AAAS	achalasia, adrenocortical insufficiency, alacrimia	NM_015665
205434_s_at	0.000175274	1.78284	AAK1	AP2 associated kinase 1	NM_014911
209460_at	0.00633522	-1.79462	ABAT	4-aminobutyrate aminotransferase	AF237813
204343_at	0.00012739	-1.51988	ABCA3	ATP-binding cassette, sub-family A (ABC1), member 3	NM_001089
208161_s_at	0.000431205	-2.10035	ABCC3	ATP-binding cassette, sub-family C (CFTR/MRP), member 3	NM_020037
214033_at	0.000396873	-1.61061	ABCC6	ATP-binding cassette, sub-family C (CFTR/MRP), member 6	AI084637
207583_at	0.0028313	1.93535	ABCD2	ATP-binding cassette, sub-family D (ALD), member 2	NM_005164
221815_at	0.0135928	-1.59878	ABHD2	abhydrolase domain containing 2	BE671816
210461_s_at	0.0035616	1.6684	ABLIM1	actin binding LIM protein 1	BC002448
205730_s_at	0.000463231	-1.85826	ABLIM3	actin binding LIM protein family, member 3	NM_014945
212477_at	0.000212335	3.25983	ACAP2	ArfGAP with coiled-coil, ankyrin repeat and PH domains 2	D26069
202323_s_at	0.000845898	1.63393	ACBD3	acyl-CoA binding domain containing 3	AI636775
201127_s_at	3.59378e-06	-1.52348	ACLY	ATP citrate lyase	NM_001096
208002_s_at	1.8932e-05	-1.87298	ACOT7	acyl-CoA thioesterase 7	NM_007274
202767_at	0.000158952	-1.61809	ACP2	acid phosphatase 2, lysosomal	NM_001610
206465_at	0.00631628	-1.56986	ACSBG1	acyl-CoA synthetase bubblegum family member 1	BE856376
211207_s_at	0.0130138	1.678	ACSL6	acyl-CoA synthetase long-chain family member 6	AF129166
AFFX-HSAC07/X00351_5_at	2.59242e-05	2.28832	ACTB	actin, beta	AFFX-HSAC07/X00351_5
217211_at	0.000450107	1.78644	ACTBP9///ACTBP9	NULL///actin, beta pseudogene 9	D50604
208637_x_at	0.00322369	1.54359	ACTN1	actinin, alpha 1	BC003576
200727_s_at	3.32378e-06	2.16628	ACTR2	ARP2 actin-related protein 2 homolog (yeast)	AA699583
213532_at	8.4802e-06	1.50883	ADAM17	ADAM metallopeptidase domain 17	AI797833
205179_s_at	0.000558103	1.9354	ADAM8	ADAM metallopeptidase domain 8	AI814527
202381_at	0.00979063	2.81144	ADAM9	ADAM metallopeptidase domain 9	NM_003816
219358_s_at	0.00352918	-2.69018	ADAP2	ArfGAP with dual PH domains 2	NM_018404
204497_at	0.00124997	-1.49989	ADCY9	adenylate cyclase 9	AB011092
214726_x_at	8.00261e-06	1.58996	ADD1	adducin 1 (alpha)	AL556041
204183_s_at	0.00595567	-1.62462	ADRBK2	adrenergic, beta, receptor kinase 2	AI478542
217729_s_at	9.29892e-05	1.79219	AES	amino-terminal enhancer of split	NM_001130
211826_s_at	0.000115125	1.54643	AFF1	AF4/FMR2 family, member 1	L22179
215451_s_at	0.000222921	1.53632	AFF1	AF4/FMR2 family, member 1	BF575588
200849_s_at	5.50738e-06	-1.94742	AHCYL1	adenosylhomocysteinase-like 1	AI589266
200848_at	0.00010826	-1.69026	AHCYL1	adenosylhomocysteinase-like 1	AA479488
220016_at	4.2579e-05	-2.11412	AHNAK	AHNAK nucleoprotein	NM_024060
202820_at	0.00673469	-1.86806	AHR	aryl hydrocarbon receptor	NM_001621
215051_x_at	0.0149661	-2.02212	AIF1	allograft inflammatory factor 1	BF213829
213810_s_at	0.000322464	1.87558	AKIRIN2-AS1///AKIRIN2-AS1	NULL///AKIRIN2 antisense RNA 1	AW007137
203809_s_at	7.54445e-07	2.36218	AKT2	v-akt murine thymoma viral oncogene homolog 2	NM_001626
211453_s_at	1.50869e-06	1.82435	AKT2	v-akt murine thymoma viral oncogene homolog 2	M77198
218373_at	0.00629089	1.54159	AKTIP	AKT interacting protein	NM_022476
202054_s_at	0.0010616	-1.55979	ALDH3A2	aldehyde dehydrogenase 3 family, member A2	NM_000382
205640_at	0.00416271	-2.18321	ALDH3B1	aldehyde dehydrogenase 3 family, member B1	NM_000694
203609_s_at	1.71743e-05	1.52843	ALDH5A1	aldehyde dehydrogenase 5 family, member A1	NM_001080
207206_s_at	0.00626717	-1.90211	ALOX12	arachidonate 12-lipoxygenase	NM_000697
208721_s_at	2.12516e-09	3.51544	ANAPC5	anaphase promoting complex subunit 5	BF967271
205141_at	0.00227697	-2.07899	ANG	angiogenin, ribonuclease, RNase A family, 5	NM_001145
213962_s_at	0.00149873	1.53689	ANKLE2	ankyrin repeat and LEM domain containing 2	AI924382
216563_at	1.90066e-05	3.35271	ANKRD12	ankyrin repeat domain 12	X80821
214723_x_at	0.0016458	2.17657	ANKRD36	ankyrin repeat domain 36	AB046861
220940_at	0.00530517	2.05204	ANKRD36B	ankyrin repeat domain 36B	NM_025190
201043_s_at	7.03353e-05	1.68256	ANP32A	acidic (leucine-rich) nuclear phosphoprotein 32 family, member A	NM_006305
220710_at	0.000344068	-1.69897	ANP32A-IT1	ANP32A intronic transcript 1 (non-protein coding)	NM_024970
210876_at	0.000548584	-1.51502	ANXA2P1	annexin A2 pseudogene 1	M62896
201302_at	0.00285854	-1.84041	ANXA4	annexin A4	NM_001153
201301_s_at	0.00623947	-1.78616	ANXA4	annexin A4	NM_001153
200782_at	0.0147237	-1.81415	ANXA5	annexin A5	NM_001154
200982_s_at	0.000109728	1.57112	ANXA6	annexin A6	NM_001155
201613_s_at	0.000381214	1.5953	AP1G2	adaptor-related protein complex 1, gamma 2 subunit	BC000519
203299_s_at	0.00233238	-2.55821	AP1S2	adaptor-related protein complex 1, sigma 2 subunit	AF251295
200613_at	1.10354e-05	1.91564	AP2M1	adaptor-related protein complex 2, mu 1 subunit	NM_004068
210974_s_at	3.10198e-07	1.56185	AP3D1	adaptor-related protein complex 3, delta 1 subunit	AF130042
202398_at	0.00134447	-1.60567	AP3S2///C15orf38-AP3S2	adaptor-related protein complex 3, sigma 2 subunit///C15orf38-AP3S2 readthrough	BC002785
219706_at	7.76983e-07	-1.51382	AP5S1	adaptor-related protein complex 5, sigma 1 subunit	NM_018347
211553_x_at	0.00423877	1.52502	APAF1	apoptotic peptidase activating factor 1	AF149794
202652_at	0.00424562	1.64193	APBB1	amyloid beta (A4) precursor protein-binding, family B, member 1 (Fe65)	NM_001164
204650_s_at	3.72228e-05	1.58703	APBB3	amyloid beta (A4) precursor protein-binding, family B, member 3	NM_006051
203526_s_at	0.00380108	-1.50562	APC	adenomatous polyposis coli	M74088
201686_x_at	2.4028e-07	1.68899	API5	apoptosis inhibitor 5	AF229254
208701_at	1.62825e-06	2.7255	APLP2	amyloid beta (A4) precursor-like protein 2	BC000373
210873_x_at	0.00664812	-2.14443	APOBEC3A///APOBEC3A_B	apolipoprotein B mRNA editing enzyme, catalytic polypeptide-like 3A///APOBEC3A and APOBEC3B deletion hybrid	U03891
220023_at	0.00351407	-1.667	APOBR	apolipoprotein B receptor	NM_018690
39249_at	0.00173878	1.54566	AQP3	aquaporin 3 (Gill blood group)	AB001325
203747_at	0.00523769	1.50609	AQP3	aquaporin 3 (Gill blood group)	NM_004925
208750_s_at	0.000100973	1.75186	ARF1///MIR3620	ADP-ribosylation factor 1///microRNA 3620	AF052179
211622_s_at	0.000193349	1.64549	ARF3	ADP-ribosylation factor 3	M33384
216689_x_at	0.000175142	1.76395	ARHGAP1	Rho GTPase activating protein 1	U62794
204492_at	0.0001389	-1.57518	ARHGAP11A	Rho GTPase activating protein 11A	NM_014783
205069_s_at	7.02092e-08	-2.02264	ARHGAP26	Rho GTPase activating protein 26	NM_015071
203910_at	0.00705077	-2.12987	ARHGAP29	Rho GTPase activating protein 29	NM_004815
206167_s_at	0.0072662	-2.77446	ARHGAP6	Rho GTPase activating protein 6	NM_001174
213606_s_at	0.000643772	1.90927	ARHGDIA	Rho GDP dissociation inhibitor (GDI) alpha	AI571798
201167_x_at	0.000616185	1.67077	ARHGDIA	Rho GDP dissociation inhibitor (GDI) alpha	NM_004309
203055_s_at	9.52426e-05	1.586	ARHGEF1	Rho guanine nucleotide exchange factor (GEF) 1	NM_004706
221656_s_at	0.00384846	-1.80697	ARHGEF10L	Rho guanine nucleotide exchange factor (GEF) 10-like	BC003073
210649_s_at	0.000732777	1.51803	ARID1A	AT rich interactive domain 1A (SWI-like)	AF231056
214139_at	6.67996e-06	2.24652	ARID4B	AT rich interactive domain 4B (RBP1-like)	AI051476
202641_at	1.13366e-05	-1.5157	ARL3	ADP-ribosylation factor-like 3	NM_004311
213759_at	0.000889859	1.63697	ARL4C	ADP-ribosylation factor-like 4C	N74140
218221_at	0.000414358	-1.50025	ARNT	aryl hydrocarbon receptor nuclear translocator	NM_001668
201954_at	0.000174959	-1.74181	ARPC1B	actin related protein 2/3 complex, subunit 1B, 41kDa	NM_005720
211672_s_at	1.38902e-06	1.60455	ARPC4	actin related protein 2/3 complex, subunit 4, 20kDa	AF019888
213702_x_at	0.0134379	-1.55847	ASAH1	N-acylsphingosine amidohydrolase (acid ceramidase) 1	AI934569
206414_s_at	0.000342115	-3.58062	ASAP2	ArfGAP with SH3 domain, ankyrin repeat and PH domain 2	NM_003887
206743_s_at	0.0140218	-2.82309	ASGR1	asialoglycoprotein receptor 1	NM_001671
218554_s_at	5.26589e-05	1.52653	ASH1L	ash1 (absent, small, or homeotic)-like (Drosophila)	NM_018489
204608_at	3.6941e-05	-1.58976	ASL	argininosuccinate lyase	NM_000048
219918_s_at	0.00583281	-1.7945	ASPM	asp (abnormal spindle) homolog, microcephaly associated (Drosophila)	NM_018123
218857_s_at	0.00839819	-1.56974	ASRGL1	asparaginase like 1	NM_025080
204998_s_at	4.78435e-06	-1.74429	ATF5	activating transcription factor 5	BC005174
204999_s_at	4.98568e-05	-1.738	ATF5	activating transcription factor 5	BC005174
216208_s_at	1.80482e-06	1.63751	ATF6B	activating transcription factor 6 beta	AU117487
207728_at	0.00133594	-1.58888	ATF7IP	activating transcription factor 7 interacting protein	NM_018005
203363_s_at	2.80739e-06	1.55682	ATG13	autophagy related 13	NM_014741
220521_s_at	0.00430497	1.86581	ATG16L1	autophagy related 16-like 1 (S. cerevisiae)	NM_017974
220237_at	0.000790675	-1.60627	ATG3	autophagy related 3	NM_022488
221492_s_at	0.00266711	-1.54669	ATG3	autophagy related 3	AF202092
219359_at	0.0109814	1.50222	ATHL1	ATH1, acid trehalase-like 1 (yeast)	NM_025092
213238_at	0.0105015	-1.59212	ATP10D	ATPase, class V, type 10D	AI478147
207521_s_at	0.000149445	2.05807	ATP2A3	ATPase, Ca++ transporting, ubiquitous	AF068220
213042_s_at	0.00110619	1.69172	ATP2A3	ATPase, Ca++ transporting, ubiquitous	AA877910
201171_at	0.00258822	1.87526	ATP6V0E1	ATPase, H+ transporting, lysosomal 9kDa, V0 subunit e1	NM_003945
201972_at	0.0110192	-1.53684	ATP6V1A	ATPase, H+ transporting, lysosomal 70kDa, V1 subunit A	AF113129
208898_at	0.0139465	-1.52556	ATP6V1D	ATPase, H+ transporting, lysosomal 34kDa, V1 subunit D	AF077614
200041_s_at	2.82002e-06	2.50523	ATP6V1G2-DDX39B///DDX39B///SNORD84	ATP6V1G2-DDX39B readthrough (NMD candidate)///DEAD (Asp-Glu-Ala-Asp) box polypeptide 39B///small nucleolar RNA, C/D box 84	NM_004640
212384_at	0.00603196	1.71077	ATP6V1G2-DDX39B///DDX39B///SNORD84	ATP6V1G2-DDX39B readthrough (NMD candidate)///DEAD (Asp-Glu-Ala-Asp) box polypeptide 39B///small nucleolar RNA, C/D box 84	AL525504
216873_s_at	0.000924808	1.57739	ATP8B2	ATPase, aminophospholipid transporter, class I, type 8B, member 2	AL137537
220416_at	0.0127993	-2.05302	ATP8B4	ATPase, class I, type 8B, member 4	NM_024837
213057_at	0.000942555	-1.54887	ATPAF2	ATP synthase mitochondrial F1 complex assembly factor 2	AW118608
211022_s_at	8.62295e-09	4.5047	ATRX	alpha thalassemia/mental retardation syndrome X-linked	BC002521
205415_s_at	0.00986099	-1.63291	ATXN3	ataxin 3	AI888099
209964_s_at	0.000153983	1.95887	ATXN7	ataxin 7	AF032105
204516_at	0.000871435	1.54726	ATXN7	ataxin 7	BG390306
212113_at	0.0143732	1.62139	ATXN7L3B	ataxin 7-like 3B	AI927479
217904_s_at	0.000504952	-1.67899	BACE1	beta-site APP-cleaving enzyme 1	AI653425
204194_at	0.00230228	-1.70018	BACH1	BTB and CNC homology 1, basic leucine zipper transcription factor 1	NM_001186
210818_s_at	0.00183873	1.51889	BACH1///GRIK1-AS2	BTB and CNC homology 1, basic leucine zipper transcription factor 1///GRIK1 antisense RNA 2	AF026199
219624_at	0.00102933	-1.78571	BAG4	BCL2-associated athanogene 4	NM_004874
220358_at	0.00516794	-1.56801	BATF3	basic leucine zipper transcription factor, ATF-like 3	NM_018664
213015_at	0.00229204	-1.5341	BBX	bobby sox homolog (Drosophila)	BF448315
205084_at	0.00489964	-1.68767	BCAP29	B-cell receptor-associated protein 29	NM_018844
214452_at	0.000897346	-1.76631	BCAT1	branched chain amino-acid transaminase 1, cytosolic	NM_005504
219528_s_at	0.00214821	1.85068	BCL11B	B-cell CLL/lymphoma 11B (zinc finger protein)	NM_022898
208536_s_at	0.000174901	2.10346	BCL2L11	BCL2-like 11 (apoptosis facilitator)	NM_006538
209311_at	0.00300021	-1.89425	BCL2L2	BCL2-like 2	D87461
221615_at	8.14293e-08	1.69767	BMP8B	bone morphogenetic protein 8b	AF104013
212547_at	5.10815e-05	-1.56811	BRD3	bromodomain containing 3	N34842
203825_at	4.46386e-06	-1.52664	BRD3	bromodomain containing 3	NM_007371
201641_at	6.72289e-05	-1.95019	BST2	bone marrow stromal cell antigen 2	NM_004335
202946_s_at	0.0127002	-1.82459	BTBD3	BTB (POZ) domain containing 3	NM_014962
201235_s_at	0.000176551	3.46186	BTG2	BTG family, member 2	BG339064
207485_x_at	0.000597432	1.60316	BTN3A1	butyrophilin, subfamily 3, member A1	NM_007048
219844_at	0.00350377	1.80084	C10orf118	chromosome 10 open reading frame 118	NM_018017
218214_at	0.00356551	-1.55411	C12orf44	chromosome 12 open reading frame 44	NM_021934
219099_at	0.000468218	-1.75915	C12orf5	chromosome 12 open reading frame 5	NM_020375
204495_s_at	0.00165563	-1.62319	C15orf39	chromosome 15 open reading frame 39	NM_015492
219785_s_at	2.54907e-06	-1.64109	C16orf95	chromosome 16 open reading frame 95	NM_024735
221739_at	7.34237e-06	-1.81942	C19orf10	chromosome 19 open reading frame 10	AL524093
216483_s_at	1.26608e-05	-1.76002	C19orf10	chromosome 19 open reading frame 10	AC005339
222281_s_at	0.00245156	-2.09008	C1orf186///LOC100505650	chromosome 1 open reading frame 186///uncharacterized LOC100505650	AW517716
212791_at	0.000489004	-1.66488	C1orf216	chromosome 1 open reading frame 216	AL042729
218232_at	0.0005591	-2.06652	C1QA	complement component 1, q subcomponent, A chain	NM_015991
219288_at	0.00012868	-3.95861	C3orf14	chromosome 3 open reading frame 14	NM_020685
205500_at	0.00595104	-1.59779	C5	complement component 5	NM_001735
221823_at	0.000506804	-1.58991	C5orf30	chromosome 5 open reading frame 30	AL565741
220216_at	0.0122266	-1.5516	C8orf44	chromosome 8 open reading frame 44	NM_019607
220038_at	0.0014717	-1.82984	C8orf44-SGK3///SGK3	C8orf44-SGK3 readthrough///serum/glucocorticoid regulated kinase family, member 3	NM_013257
204480_s_at	0.000632472	2.10566	C9orf16	chromosome 9 open reading frame 16	NM_024112
41047_at	0.000627319	1.58027	C9orf16	chromosome 9 open reading frame 16	AI885170
208077_at	0.00223229	-1.55134	C9orf38	chromosome 9 open reading frame 38	NM_014126
221865_at	0.0030236	-1.74809	C9orf91	chromosome 9 open reading frame 91	BF969986
209301_at	0.006267	-3.13432	CA2	carbonic anhydrase II	M36532
215954_s_at	0.000804144	1.67189	CACTIN	cactin, spliceosome C complex subunit	AI200896
213815_x_at	0.000287338	1.52613	CACTIN	cactin, spliceosome C complex subunit	AI913329
216535_at	4.23035e-05	1.53684	CADM3	cell adhesion molecule 3	AL050219
209002_s_at	5.957e-07	1.59154	CALCOCO1	calcium binding and coiled-coil domain 1	BC003177
212077_at	0.00724443	-4.1114	CALD1	caldesmon 1	AL583520
213710_s_at	8.46508e-07	1.78832	CALM1	calmodulin 1 (phosphorylase kinase, delta)	AL523275
213688_at	2.2862e-05	2.88841	CALM1	calmodulin 1 (phosphorylase kinase, delta)///calmodulin 2 (phosphorylase kinase, delta)///calmodulin 3 (phosphorylase kinase, delta)	N25325
64408_s_at	0.00457126	-3.11403	CALML4	calmodulin-like 4	AW025529
221879_at	0.00505405	-2.80594	CALML4	calmodulin-like 4	AA886335
210349_at	0.00060492	2.15542	CAMK4	calcium/calmodulin-dependent protein kinase IV	L24959
220162_s_at	0.00926645	-2.11188	CARD9	caspase recruitment domain family, member 9	NM_022352
211140_s_at	4.45269e-07	1.94433	CASP2	caspase 2, apoptosis-related cysteine peptidase	AF314174
209812_x_at	4.79988e-05	1.89441	CASP2	caspase 2, apoptosis-related cysteine peptidase	BC002427
203324_s_at	0.00451256	-2.03223	CAV2	caveolin 2	NM_001233
209145_s_at	0.000188078	1.55068	CBFA2T2	core-binding factor, runt domain, alpha subunit 2; translocated to, 2	AI810484
208056_s_at	0.0108343	-1.82232	CBFA2T3	core-binding factor, runt domain, alpha subunit 2; translocated to, 3	NM_005187
206788_s_at	3.27783e-05	1.59881	CBFB	core-binding factor, beta subunit	AF294326
206724_at	0.0042899	1.98191	CBX4	chromobox homolog 4	NM_003655
214037_s_at	0.000207729	-1.49948	CCDC22	coiled-coil domain containing 22	BF224247
212886_at	2.59624e-05	-1.66953	CCDC69	coiled-coil domain containing 69	AL080169
220693_at	1.1231e-07	1.63548	CCDC82	coiled-coil domain containing 82	NM_014148
215343_at	0.00309885	-1.7516	CCDC88C	coiled-coil domain containing 88C	AF070587
219273_at	4.73033e-07	1.97281	CCNK	cyclin K	NM_003858
208376_at	6.15395e-05	1.78695	CCR4	chemokine (C-C motif) receptor 4	NM_005508
206337_at	0.00314246	2.19504	CCR7	chemokine (C-C motif) receptor 7	NM_001838
207445_s_at	0.00998313	1.72745	CCR9	chemokine (C-C motif) receptor 9	AF145439
201946_s_at	0.000128996	1.72014	CCT2	chaperonin containing TCP1, subunit 2 (beta)	AL545982
210436_at	0.000303062	1.59771	CCT8	chaperonin containing TCP1, subunit 8 (theta)	BC005220
208653_s_at	4.14276e-07	1.89875	CD164	CD164 molecule, sialomucin	AF299343
205831_at	0.00133024	1.99875	CD2	CD2 molecule	NM_001767
209772_s_at	0.0124153	2.11716	CD24	CD24 molecule	X69397
220307_at	0.00139973	-1.79743	CD244	CD244 molecule, natural killer cell receptor 2B4	AF242540
206150_at	0.00351364	1.95976	CD27	CD27 molecule	NM_001242
211861_x_at	3.31674e-05	2.75088	CD28	CD28 molecule	AF222343
211856_x_at	2.92293e-06	2.39822	CD28	CD28 molecule	AF222341
206545_at	0.000828692	1.90367	CD28	CD28 molecule	NM_006139
207270_x_at	0.00333308	-1.56033	CD300C	CD300c molecule	NM_006678
205456_at	0.000298629	2.66532	CD3E	CD3e molecule, epsilon (CD3-TCR complex)	NM_000733
206804_at	0.000200819	2.1287	CD3G	CD3g molecule, gamma (CD3-TCR complex)	NM_000073
216056_at	0.004603	1.92801	CD44	CD44 molecule (Indian blood group)	AW851559
210916_s_at	0.00109718	1.72063	CD44	CD44 molecule (Indian blood group)	AF098641
217523_at	0.0151847	1.6102	CD44	CD44 molecule (Indian blood group)	AV700298
211574_s_at	2.60716e-06	2.45649	CD46	CD46 molecule, complement regulatory protein	D84105
207549_x_at	3.96844e-06	2.2672	CD46	CD46 molecule, complement regulatory protein	NM_002389
206485_at	0.00025801	1.85436	CD5	CD5 molecule	NM_014207
208602_x_at	2.04725e-07	3.66834	CD6	CD6 molecule	NM_006725
211893_x_at	7.10538e-07	3.26524	CD6	CD6 molecule	U66145
211900_x_at	6.01782e-07	2.74453	CD6	CD6 molecule	U66146
203507_at	0.00671359	-2.33266	CD68///SNORA67	CD68 molecule///small nucleolar RNA, H/ACA box 67	NM_001251
214551_s_at	1.69936e-05	2.89119	CD7	CD7 molecule	NM_006137
211192_s_at	5.97918e-06	2.54858	CD84	CD84 molecule	AF054818
211190_x_at	1.9308e-06	2.38361	CD84	CD84 molecule	AF054817
211189_x_at	6.11483e-06	2.03074	CD84	CD84 molecule	AF054816
211188_at	1.50892e-05	1.73375	CD84	CD84 molecule	U96627
207979_s_at	0.0121345	1.6636	CD8B///LOC100996919	CD8b molecule///putative T-cell surface glycoprotein CD8 beta-2 chain-like	NM_004931
202910_s_at	0.00467008	-1.53238	CD97	CD97 molecule	NM_001784
201028_s_at	0.00478648	1.52712	CD99	CD99 molecule	U82164
210743_s_at	3.29039e-05	2.24838	CDC14A	cell division cycle 14A	AF064103
210440_s_at	0.000183645	1.77748	CDC14A	cell division cycle 14A	AF064102
210742_at	0.00638125	1.68662	CDC14A	cell division cycle 14A	AF064103
211347_at	0.00238112	1.50726	CDC14B	cell division cycle 14B	AF064105
201853_s_at	0.000155039	1.79468	CDC25B	cell division cycle 25B	NM_021873
217878_s_at	0.000768138	1.84604	CDC27	cell division cycle 27	NM_001256
214464_at	0.00670638	-1.63434	CDC42BPA	CDC42 binding protein kinase alpha (DMPK-like)	NM_003607
214721_x_at	0.00037481	-1.81835	CDC42EP4	CDC42 effector protein (Rho GTPase binding) 4	AL162074
209055_s_at	0.00235118	1.75756	CDC5L	cell division cycle 5-like	AW268817
201131_s_at	0.000225411	-1.93248	CDH1	cadherin 1, type 1, E-cadherin (epithelial)	NM_004360
210622_x_at	5.22361e-05	1.75832	CDK10	cyclin-dependent kinase 10	AF153430
207428_x_at	0.000167301	1.57194	CDK11A///CDK11B	cyclin-dependent kinase 11A///cyclin-dependent kinase 11B	NM_001787
215329_s_at	0.000930466	1.5512	CDK11A///CDK11B	cyclin-dependent kinase 11A///cyclin-dependent kinase 11B	AL031282
207319_s_at	0.00319817	1.50718	CDK13	cyclin-dependent kinase 13	NM_003718
207239_s_at	3.92107e-05	1.56836	CDK16	cyclin-dependent kinase 16	NM_006201
206474_at	0.00352439	1.55747	CDK17	cyclin-dependent kinase 17	NM_002595
211804_s_at	4.2742e-06	1.62674	CDK2	cyclin-dependent kinase 2	AB012305
201938_at	0.00262089	-2.18	CDK2AP1	cyclin-dependent kinase 2 associated protein 1	NM_004642
213348_at	0.0071179	-3.63245	CDKN1C	cyclin-dependent kinase inhibitor 1C (p57, Kip2)	N33167
216894_x_at	0.0105327	-2.63749	CDKN1C	cyclin-dependent kinase inhibitor 1C (p57, Kip2)	D64137
213182_x_at	0.0109123	-2.62574	CDKN1C	cyclin-dependent kinase inhibitor 1C (p57, Kip2)	R78668
213548_s_at	3.85684e-05	2.37467	CDV3	CDV3 homolog (mouse)	BG257762
216605_s_at	0.00151655	1.63033	CEACAM21	carcinoembryonic antigen-related cell adhesion molecule 21	AC005626
204203_at	0.000223786	-1.71322	CEBPG	CCAAT/enhancer binding protein (C/EBP), gamma	NM_001806
204113_at	2.21805e-06	1.97748	CELF1	CUGBP, Elav-like family member 1	NM_006560
218148_at	0.00128169	1.55258	CENPT	centromere protein T	NM_025082
213957_s_at	0.0159612	1.83255	CEP350	centrosomal protein 350kDa	AA635523
209194_at	6.28944e-05	-1.50161	CETN2	centrin, EF-hand protein, 2	BC005334
205382_s_at	0.00670528	-2.72518	CFD	complement factor D (adipsin)	NM_001928
214426_x_at	0.000177242	-1.56385	CHAF1A	chromatin assembly factor 1, subunit A (p150)	BF062223
207645_s_at	0.000197233	1.55339	CHD1L///LOC101060601	chromodomain helicase DNA binding protein 1-like///chromodomain-helicase-DNA-binding protein 1-like	NM_004284
220586_at	0.00956754	-1.57294	CHD9	chromodomain helicase DNA binding protein 9	NM_025134
202536_at	0.000359938	-1.53322	CHMP2B	charged multivesicular body protein 2B	AK002165
213385_at	0.000383379	-1.74976	CHN2	chimerin 2	AK026415
210123_s_at	0.000180528	-1.57597	CHRFAM7A///CHRNA7	CHRNA7 (cholinergic receptor, nicotinic, alpha 7, exons 5-10) and FAM7A (family with sequence similarity 7A, exons A-E) fusion///cholinergic receptor, nicotinic, alpha 7 (neuronal)	U62436
206756_at	0.00937673	-1.55767	CHST7	carbohydrate (N-acetylglucosamine 6-O) sulfotransferase 7	NM_019886
217501_at	4.67546e-06	-1.80968	CIAO1	cytosolic iron-sulfur protein assembly 1	AI339732
212308_at	0.000445327	-1.70483	CLASP2	cytoplasmic linker associated protein 2	AL137636
218775_s_at	0.000205087	-2.11554	CLDN22///WWC2	claudin 22///WW and C2 domain containing 2	NM_024949
220132_s_at	1.13629e-05	3.17801	CLEC2D	C-type lectin domain family 2, member D	NM_013269
205200_at	0.000608374	-2.04233	CLEC3B///EXOSC7	C-type lectin domain family 3, member B///exosome component 7	NM_003278
213415_at	0.0143915	-2.3262	CLIC2	chloride intracellular channel 2	AI768628
201560_at	0.0139073	-2.25857	CLIC4	chloride intracellular channel 4	NM_013943
201768_s_at	3.13589e-07	1.53557	CLINT1	clathrin interactor 1	BC004467
209143_s_at	0.00282484	-1.53863	CLNS1A	chloride channel, nucleotide-sensitive, 1A	AF005422
221845_s_at	0.00084742	-1.51381	CLPB	ClpB caseinolytic peptidase B homolog (E. coli)	AI655698
211136_s_at	7.31838e-05	2.02918	CLPTM1	cleft lip and palate associated transmembrane protein 1	BC004865
204050_s_at	0.00640949	-1.54936	CLTA	clathrin, light chain A	NM_001833
216295_s_at	0.00472312	-1.52797	CLTA	clathrin, light chain A	X81636
222043_at	0.00581083	-2.04602	CLU	clusterin	AI982754
219442_at	0.00303018	1.67778	CLUHP3	clustered mitochondria (cluA/CLU1) homolog pseudogene 3	NM_024048
221900_at	0.00268306	-1.62493	COL8A2	collagen, type VIII, alpha 2	NM_005202
214336_s_at	1.0969e-05	2.02096	COPA	coatomer protein complex, subunit alpha	AI621079
213379_at	0.00434286	-2.40368	COQ2	coenzyme Q2 4-hydroxybenzoate polyprenyltransferase	AF091086
219547_at	0.00544414	-1.51481	COX15	cytochrome c oxidase assembly homolog 15 (yeast)	NM_004376
221550_at	0.00866199	-1.50257	COX15	cytochrome c oxidase assembly homolog 15 (yeast)	BC002382
203880_at	0.000860542	-1.53319	COX17	COX17 cytochrome c oxidase copper chaperone	NM_005694
213736_at	0.000180294	1.5554	COX5B	cytochrome c oxidase subunit Vb	AI557312
201940_at	0.0148413	-1.62397	CPD	carboxypeptidase D	AA897514
206100_at	0.00471099	-2.88059	CPM	carboxypeptidase M	NM_001874
203634_s_at	0.000176605	1.65113	CPT1A	carnitine palmitoyltransferase 1A (liver)	NM_001876
210688_s_at	0.000139356	1.5081	CPT1A	carnitine palmitoyltransferase 1A (liver)	BC000185
204264_at	0.000210118	-1.65011	CPT2	carnitine palmitoyltransferase 2	NM_000098
206244_at	0.00341257	-1.79351	CR1	complement component (3b/4b) receptor 1 (Knops blood group)	NM_000573
203899_s_at	1.7274e-07	1.65001	CRCP	CGRP receptor component	NM_014478
204312_x_at	1.63436e-06	1.65348	CREB1	cAMP responsive element binding protein 1	AI655737
213584_s_at	0.000372883	1.83829	CREBZF	CREB/ATF bZIP transcription factor	AI432137
201380_at	0.00617166	-1.66714	CRTAP///LOC100653071	cartilage associated protein///cartilage-associated protein-like	NM_006371
210340_s_at	0.00556249	-2.19036	CSF2RA	colony stimulating factor 2 receptor, alpha, low-affinity (granulocyte-macrophage)	BC002635
202574_s_at	3.74114e-06	1.64008	CSNK1G2	casein kinase 1, gamma 2	AL530441
215549_x_at	0.000123741	1.61491	CTAGE4///CTAGE8///CTAGE9///LOC101060696	CTAGE family, member 4///CTAGE family, member 8///CTAGE family, member 9///cutaneous T-cell lymphoma-associated antigen 4-like	AC005587
210835_s_at	0.0029064	-2.15997	CTBP2	C-terminal binding protein 2	AF222711
201219_at	0.00499266	-2.01251	CTBP2	C-terminal binding protein 2	AW269836
201220_x_at	0.0105657	-1.75195	CTBP2	C-terminal binding protein 2	NM_001329
214316_x_at	4.29631e-06	-1.57235	CTC-425F1.4///OTTHUMG00000180575	NULL///NULL	AI378706
212952_at	0.000544331	-1.52678	CTC-425F1.4///OTTHUMG00000180575	NULL///NULL	AA910371
201906_s_at	0.00251728	-1.80636	CTDSPL	CTD (carboxy-terminal domain, RNA polymerase II, polypeptide A) small phosphatase-like	NM_005808
221331_x_at	7.53057e-05	2.25663	CTLA4	cytotoxic T-lymphocyte-associated protein 4	NM_005214
200765_x_at	0.00218203	-2.49135	CTNNA1	catenin (cadherin-associated protein), alpha 1, 102kDa	NM_001903
210844_x_at	0.00103632	-2.37978	CTNNA1	catenin (cadherin-associated protein), alpha 1, 102kDa	D14705
200764_s_at	0.00374971	-2.21913	CTNNA1	catenin (cadherin-associated protein), alpha 1, 102kDa	AI826881
208407_s_at	0.0120908	-2.33379	CTNND1///TMX2-CTNND1	catenin (cadherin-associated protein), delta 1///TMX2-CTNND1 readthrough (NMD candidate)	NM_001331
213275_x_at	0.00155511	-2.76405	CTSB	cathepsin B	W47179
200839_s_at	0.013513	-2.22062	CTSB	cathepsin B	NM_001908
201487_at	0.00100178	-1.71744	CTSC	cathepsin C	NM_001814
202087_s_at	0.000438998	-1.99693	CTSL1	cathepsin L1	NM_001912
214073_at	0.000971199	-2.74331	CTTN	cortactin	BG475299
201059_at	0.00774686	-2.73275	CTTN	cortactin	NM_005231
213920_at	0.00246743	-1.79639	CUX2	cut-like homeobox 2	AB006631
204533_at	0.00217298	-2.34426	CXCL10	chemokine (C-X-C motif) ligand 10	NM_001565
209774_x_at	0.0149025	1.53166	CXCL2	chemokine (C-X-C motif) ligand 2	M57731
214974_x_at	0.00361107	-6.06815	CXCL5	chemokine (C-X-C motif) ligand 5	AK026546
215101_s_at	0.00329747	-3.72767	CXCL5	chemokine (C-X-C motif) ligand 5	BG166705
211469_s_at	0.00821052	1.73247	CXCR6	chemokine (C-X-C motif) receptor 6	U73531
220252_x_at	0.0130677	-1.67224	CXorf21	chromosome X open reading frame 21	NM_025159
208923_at	0.0155347	-2.81641	CYFIP1	cytoplasmic FMR1 interacting protein 1	BC005097
214272_at	0.000166493	1.57786	CYLD	cylindromatosis (turban tumor syndrome)	AI362018
202879_s_at	1.60846e-08	2.34627	CYTH1	cytohesin 1	NM_004762
211521_s_at	4.14111e-06	1.79124	CYTH4	cytohesin 4	AF125349
201280_s_at	0.00453053	-2.69828	DAB2	Dab, mitogen-responsive phosphoprotein, homolog 2 (Drosophila)	NM_001343
201278_at	0.00465478	-2.59735	DAB2	Dab, mitogen-responsive phosphoprotein, homolog 2 (Drosophila)	N21202
203890_s_at	1.18448e-06	2.10938	DAPK3///MIR637	death-associated protein kinase 3///microRNA 637	BF686824
212595_s_at	0.000176607	2.26512	DAZAP2	DAZ associated protein 2	AL534321
221224_s_at	0.000109615	1.52266	DCAKD	dephospho-CoA kinase domain containing	NM_024819
222233_s_at	0.0012028	-1.54285	DCLRE1C	DNA cross-link repair 1C	AK022922
217973_at	0.00261558	1.7123	DCXR	dicarbonyl/L-xylulose reductase	NM_016286
214909_s_at	0.000254836	-1.68853	DDAH2	dimethylarginine dimethylaminohydrolase 2	AK026191
215537_x_at	0.0007797	-1.518	DDAH2	dimethylarginine dimethylaminohydrolase 2	AJ012008
208149_x_at	0.00167669	1.55355	DDX11	DEAD/H (Asp-Glu-Ala-Asp/His) box helicase 11	NM_030653
213378_s_at	0.000227935	1.81064	DDX11///DDX12P///LOC642846	DEAD/H (Asp-Glu-Ala-Asp/His) box helicase 11///DEAD/H (Asp-Glu-Ala-Asp/His) box polypeptide 12, pseudogene///DEAD/H (Asp-Glu-Ala-Asp/His) box polypeptide 11-like	AI983033
213998_s_at	5.13333e-05	4.75306	DDX17	DEAD (Asp-Glu-Ala-Asp) box helicase 17	AW188131
208151_x_at	0.000630195	3.4842	DDX17	DEAD (Asp-Glu-Ala-Asp) box helicase 17	NM_030881
208719_s_at	0.000855232	3.19115	DDX17	DEAD (Asp-Glu-Ala-Asp) box helicase 17	U59321
200702_s_at	0.00155935	1.52496	DDX24	DEAD (Asp-Glu-Ala-Asp) box polypeptide 24	BG421209
201211_s_at	5.90252e-06	3.22423	DDX3X	DEAD (Asp-Glu-Ala-Asp) box polypeptide 3, X-linked	NM_001356
212514_x_at	9.31667e-05	2.59413	DDX3X	DEAD (Asp-Glu-Ala-Asp) box polypeptide 3, X-linked	R60068
204909_at	0.000119536	4.7049	DDX6	DEAD (Asp-Glu-Ala-Asp) box helicase 6	NM_004397
211255_x_at	4.41839e-05	1.78482	DEDD	death effector domain containing	AF064605
202480_s_at	5.40309e-06	1.5153	DEDD	death effector domain containing	NM_004216
219763_at	0.000425046	-2.48396	DENND1A	DENN/MADD domain containing 1A	NM_024820
218102_at	0.00134496	-1.57426	DERA	deoxyribose-phosphate aldolase (putative)	NM_015954
203695_s_at	0.0105767	1.54557	DFNA5	deafness, autosomal dominant 5	NM_004403
211272_s_at	1.05701e-05	6.10865	DGKA	diacylglycerol kinase, alpha 80kDa	AF064771
203385_at	0.000191543	3.30902	DGKA	diacylglycerol kinase, alpha 80kDa	NM_001345
213868_s_at	0.00572868	1.73811	DHRS7	dehydrogenase/reductase (SDR family) member 7	AW243128
220690_s_at	0.00925634	-1.56295	DHRS7B	dehydrogenase/reductase (SDR family) member 7B	NM_015510
209916_at	3.76596e-06	-1.54206	DHTKD1	dehydrogenase E1 and transketolase domain containing 1	BC002477
212649_at	0.00320536	2.05925	DHX29	DEAH (Asp-Glu-Ala-His) box polypeptide 29	AL079292
213420_at	0.00643273	-1.59268	DHX57	DEAH (Asp-Glu-Ala-Asp/His) box polypeptide 57	AA100250
212105_s_at	8.36518e-09	4.78313	DHX9	DEAH (Asp-Glu-Ala-His) box helicase 9	BF313832
212107_s_at	1.8562e-05	2.48462	DHX9	DEAH (Asp-Glu-Ala-His) box helicase 9	BE561014
215541_s_at	5.75239e-06	1.63378	DIAPH1	diaphanous-related formin 1	AK023345
205726_at	0.000855045	-2.54158	DIAPH2	diaphanous-related formin 2	NM_006729
205603_s_at	0.00204499	-1.51666	DIAPH2	diaphanous-related formin 2	NM_007309
212503_s_at	0.0150139	1.51333	DIP2C	DIP2 disco-interacting protein 2 homolog C (Drosophila)	N22859
218362_s_at	0.00875813	-1.54768	DIS3	DIS3 mitotic control homolog (S. cerevisiae)	NM_014953
217208_s_at	8.93577e-05	1.5687	DLG1	discs, large homolog 1 (Drosophila)	AL121981
33768_at	8.54939e-05	1.50979	DMWD	dystrophia myotonica, WD repeat containing	L19267
215761_at	0.00595175	-1.74107	DMXL2	Dmx-like 2	AK000156
220725_x_at	1.00032e-05	1.68063	DNAH3	dynein, axonemal, heavy chain 3	NM_025095
200664_s_at	0.00182171	2.54731	DNAJB1	DnaJ (Hsp40) homolog, subfamily B, member 1	NM_006145
200666_s_at	0.00418043	2.00697	DNAJB1	DnaJ (Hsp40) homolog, subfamily B, member 1	NM_006145
212490_at	7.89857e-05	-1.54569	DNAJC8	DnaJ (Hsp40) homolog, subfamily C, member 8	AA843895
203912_s_at	0.000140938	-1.83136	DNASE1L1	deoxyribonuclease I-like 1	NM_006730
205554_s_at	0.00559472	-1.84742	DNASE1L3	deoxyribonuclease I-like 3	NM_004944
209839_at	0.0109253	-1.86715	DNM3	dynamin 3	AL136712
218457_s_at	0.000224737	1.85092	DNMT3A	DNA (cytosine-5-)-methyltransferase 3 alpha	NM_022552
215041_s_at	0.000108227	1.63454	DOCK9	dedicator of cytokinesis 9	BE259050
214054_at	0.00169982	-1.64999	DOK2	docking protein 2, 56kDa	AI828929
215982_s_at	0.00685209	1.53051	DOM3Z	dom-3 homolog Z (C. elegans)	AL049547
205248_at	0.000232915	-1.50819	DOPEY2	dopey family member 2	NM_005128
203716_s_at	0.00931405	1.60713	DPP4	dipeptidyl-peptidase 4	NM_001935
212792_at	9.24013e-05	-1.61543	DPY19L1	dpy-19-like 1 (C. elegans)	AB020684
200762_at	0.00478539	-2.4873	DPYSL2	dihydropyrimidinase-like 2	NM_001386
218627_at	0.00354722	-2.25135	DRAM1	DNA-damage regulated autophagy modulator 1	NM_018370
203258_at	0.000445334	1.52059	DRAP1	DR1-associated protein 1 (negative cofactor 2 alpha)	NM_006442
203267_s_at	1.47666e-05	1.59524	DRG2	developmentally regulated GTP binding protein 2	BF223206
217309_s_at	2.25598e-05	1.56424	DSCR3	Down syndrome critical region gene 3	AJ001867
216072_at	3.9813e-05	1.59366	DSTNP1///DSTNP1	destrin (actin depolymerizing factor) pseudogene 1///NULL	AL050065
221563_at	0.00106952	-1.5567	DUSP10	dual specificity phosphatase 10	N36770
201536_at	0.00174599	-2.09361	DUSP3	dual specificity phosphatase 3	AL048503
213848_at	0.00289086	-1.6822	DUSP7	dual specificity phosphatase 7	AI655015
211541_s_at	0.00204589	1.5061	DYRK1A	dual-specificity tyrosine-(Y)-phosphorylation regulated kinase 1A	U52373
207231_at	0.00889373	1.59492	DZIP3	DAZ interacting zinc finger protein 3	NM_014648
203692_s_at	8.31477e-05	1.54994	E2F3	E2F transcription factor 3	AI640363
38707_r_at	4.18021e-06	1.5239	E2F4	E2F transcription factor 4, p107/p130-binding	S75174
202735_at	0.000153013	-1.58293	EBP	emopamil binding protein (sterol isomerase)	NM_006579
220048_at	0.0105213	1.61101	EDAR	ectodysplasin A receptor	NM_022336
204840_s_at	0.00363801	2.27405	EEA1	early endosome antigen 1	NM_003566
213087_s_at	6.07582e-06	4.55401	EEF1D	eukaryotic translation elongation factor 1 delta (guanine nucleotide exchange protein)	BF690020
214395_x_at	1.6431e-05	2.43626	EEF1D	eukaryotic translation elongation factor 1 delta (guanine nucleotide exchange protein)	AI613383
213907_at	0.000700698	1.82135	EEF1E1	eukaryotic translation elongation factor 1 epsilon 1	N32257
201777_s_at	0.000106648	1.84668	EFCAB14	EF-hand calcium binding domain 14	BC002525
201775_s_at	3.73425e-06	1.74526	EFCAB14	EF-hand calcium binding domain 14	AA676790
206254_at	0.00678314	-1.76643	EGF	epidermal growth factor	NM_001963
212650_at	0.00224893	1.59527	EHBP1	EH domain binding protein 1	BF116032
209038_s_at	1.67222e-06	1.50729	EHD1	EH-domain containing 1	AL579035
205321_at	3.20416e-05	2.39221	EIF2S3	eukaryotic translation initiation factor 2, subunit 3 gamma, 52kDa	NM_001415
211937_at	6.93095e-06	2.01645	EIF4B	eukaryotic translation initiation factor 4B	NM_001417
213571_s_at	0.000220085	-1.7232	EIF4E2	eukaryotic translation initiation factor 4E family member 2	BF516289
209393_s_at	0.00107445	-1.67321	EIF4E2	eukaryotic translation initiation factor 4E family member 2	AF047695
208625_s_at	3.69811e-07	-1.63947	EIF4G1	eukaryotic translation initiation factor 4 gamma, 1	BE966878
217607_x_at	0.000276172	1.7588	EIF4G2	eukaryotic translation initiation factor 4 gamma, 2	AA733172
201123_s_at	0.0151143	1.7458	EIF5A	eukaryotic translation initiation factor 5A	NM_001970
214313_s_at	0.000702013	2.42695	EIF5B	eukaryotic translation initiation factor 5B	BE138647
201026_at	4.43759e-05	1.84285	EIF5B	eukaryotic translation initiation factor 5B	AB018284
212420_at	0.00133986	1.93733	ELF1	E74-like factor 1 (ets domain transcription factor)	KJ896761
210850_s_at	4.6688e-05	1.6034	ELK1	ELK1, member of ETS oncogene family	AF000672
221980_at	0.00019102	-1.82543	EMILIN2	elastin microfibril interfacer 2	AL117592
203729_at	0.00615233	1.59671	EMP3	epithelial membrane protein 3	NM_001425
207111_at	0.00342286	-2.51274	EMR1	egf-like module containing, mucin-like, hormone receptor-like 1	NM_001974
217294_s_at	0.00117492	1.77948	ENO1	enolase 1, (alpha)	U88968
216554_s_at	9.69332e-05	1.65714	ENO1	enolase 1, (alpha)	U88968
32042_at	0.000102378	-1.57586	ENOX2	ecto-NOX disulfide-thiol exchanger 2	S72904
207793_s_at	6.44769e-05	2.89859	EPB41	erythrocyte membrane protein band 4.1 (elliptocytosis 1, RH-linked)	NM_004437
214530_x_at	5.94112e-05	1.69001	EPB41	erythrocyte membrane protein band 4.1 (elliptocytosis 1, RH-linked)	AF156225
206710_s_at	0.0127049	-4.51208	EPB41L3	erythrocyte membrane protein band 4.1-like 3	NM_012307
211776_s_at	0.00997446	-4.11597	EPB41L3	erythrocyte membrane protein band 4.1-like 3	BC006141
396_f_at	6.68709e-05	2.05435	EPOR	erythropoietin receptor	X97671
200841_s_at	0.00180566	2.3262	EPRS	glutamyl-prolyl-tRNA synthetase	AI142677
202609_at	0.00663848	-2.17963	EPS8	epidermal growth factor receptor pathway substrate 8	NM_004447
209701_at	0.000140706	2.0506	ERAP1	endoplasmic reticulum aminopeptidase 1	D16217
203719_at	0.00109788	-1.56108	ERCC1	excision repair cross-complementing rodent repair deficiency, complementation group 1 (includes overlapping antisense sequence)	NM_001983
208973_at	0.00393915	1.53969	ERI3	ERI1 exoribonuclease family member 3	BC001072
202444_s_at	0.00146117	1.58979	ERLIN1	ER lipid raft associated 1	NM_006459
221542_s_at	0.000108879	-1.53254	ERLIN2	ER lipid raft associated 2	AL442077
219905_at	0.000145162	-1.96647	ERMAP	erythroblast membrane-associated protein (Scianna blood group)	NM_018538
222262_s_at	0.00609586	-1.59667	ETNK1	ethanolamine kinase 1	AL137750
214447_at	0.00480506	2.2483	ETS1	v-ets erythroblastosis virus E26 oncogene homolog 1 (avian)	NM_005238
201328_at	0.0117147	-1.82652	ETS2	v-ets erythroblastosis virus E26 oncogene homolog 2 (avian)	NM_005239
209717_at	0.00622145	-2.45184	EVI5	ecotropic viral integration site 5	AF008915
210012_s_at	0.000125922	1.85339	EWSR1	EWS RNA-binding protein 1	BC000527
214734_at	5.80227e-05	2.19176	EXPH5	exophilin 5	AB014524
201995_at	0.00177006	-1.83976	EXT1	exostosin glycosyltransferase 1	NM_000127
211310_at	0.0039231	1.68831	EZH1	enhancer of zeste homolog 1 (Drosophila)	AB004818
217230_at	8.62875e-06	2.9348	EZR	ezrin	AF199015
208621_s_at	1.3778e-05	2.73076	EZR	ezrin	BF663141
217234_s_at	9.148e-06	2.59365	EZR	ezrin	AF199015
208962_s_at	0.0022109	-2.89591	FADS1///MIR1908	fatty acid desaturase 1///microRNA 1908	BE540552
208963_x_at	1.54214e-05	-1.94406	FADS1///MIR1908	fatty acid desaturase 1///microRNA 1908	AL512760
208964_s_at	0.000735732	-1.81916	FADS1///MIR1908	fatty acid desaturase 1///microRNA 1908	AL512760
202862_at	3.51318e-05	-2.04086	FAH	fumarylacetoacetate hydrolase (fumarylacetoacetase)	NM_000137
221602_s_at	2.13102e-05	3.14651	FAIM3	Fas apoptotic inhibitory molecule 3	AI084226
221601_s_at	0.00107703	2.11659	FAIM3	Fas apoptotic inhibitory molecule 3	AI084226
212400_at	0.00714629	1.64965	FAM102A	family with sequence similarity 102, member A	AL043266
221959_at	0.00447467	-1.60592	FAM110B	family with sequence similarity 110, member B	BE672313
222129_at	0.000174287	-1.51071	FAM134A	family with sequence similarity 134, member A	AK026155
218510_x_at	0.0118105	1.52149	FAM134B	family with sequence similarity 134, member B	NM_019000
213463_s_at	0.000546177	-1.63839	FAM149B1	family with sequence similarity 149, member B1	AW300504
221804_s_at	0.00225165	-1.53098	FAM45A///FAM45B	family with sequence similarity 45, member A///family with sequence similarity 45, member A pseudogene	AI697488
221766_s_at	0.00304269	-1.68386	FAM46A	family with sequence similarity 46, member A	AW246673
209683_at	0.0152403	-1.99313	FAM49A	family with sequence similarity 49, member A	AA243659
206707_x_at	0.000601375	1.57974	FAM65B	family with sequence similarity 65, member B	NM_015864
65585_at	5.43449e-05	1.53889	FAM86B1///FAM86B2///FAM86C1///FAM86DP///FAM86FP	family with sequence similarity 86, member B1///family with sequence similarity 86, member B2///family with sequence similarity 86, member C1///family with sequence similarity 86, member D, pseudogene///family with sequence similarity 86, member A pseudogene	AA527515
212218_s_at	0.00020747	1.5422	FASN	fatty acid synthase	AI954041
48031_r_at	0.00845297	-1.56716	FAXDC2	fatty acid hydroxylase domain containing 2	H93077
203184_at	0.00950191	-3.00679	FBN2	fibrillin 2	NM_001999
215717_s_at	0.000509176	-1.89472	FBN2	fibrillin 2	X62009
209696_at	0.00213266	-2.35639	FBP1	fructose-1,6-bisphosphatase 1	D26054
219608_s_at	2.30447e-06	1.56419	FBXO38	F-box protein 38	NM_024862
212991_at	0.00318691	-1.714	FBXO9	F-box protein 9	AL031178
209456_s_at	4.18321e-05	1.74228	FBXW11	F-box and WD repeat domain containing 11	AB033281
216950_s_at	0.00256849	-2.47111	FCGR1A///FCGR1B///FCGR1C	Fc fragment of IgG, high affinity Ia, receptor (CD64)///Fc fragment of IgG, high affinity Ib, receptor (CD64)///Fc fragment of IgG, high affinity Ic, receptor (CD64), pseudogene	X14355
205418_at	0.00328349	-2.08561	FES	feline sarcoma oncogene	NM_002005
215602_at	0.00500998	-1.73188	FGD2	FYVE, RhoGEF and PH domain containing 2	AK024456
219901_at	0.00631588	-2.39826	FGD6	FYVE, RhoGEF and PH domain containing 6	NM_018351
205587_at	0.00116466	1.5282	FGFR1OP	FGFR1 oncogene partner	NM_007045
208229_at	0.00805994	1.56357	FGFR2	fibroblast growth factor receptor 2	NM_022975
206492_at	0.00861705	2.02036	FHIT	fragile histidine triad	NM_002012
203656_at	0.00271359	-1.62152	FIG4	FIG4 homolog, SAC1 lipid phosphatase domain containing (S. cerevisiae)	NM_014845
210187_at	0.000178837	-2.46451	FKBP1A	FK506 binding protein 1A, 12kDa	BC005147
206857_s_at	0.000245572	-2.31446	FKBP1B	FK506 binding protein 1B, 12.6 kDa	NM_004116
203391_at	8.60014e-07	-1.68581	FKBP2	FK506 binding protein 2, 13kDa	NM_004470
204560_at	0.00297991	2.07148	FKBP5	FK506 binding protein 5	NM_004117
211454_x_at	1.41856e-05	2.03764	FKSG49	FKSG49	AF336878
208120_x_at	4.30539e-05	1.78822	FKSG49///LOC402469	FKSG49///uncharacterized LOC402469	NM_031221
211825_s_at	1.65364e-06	2.27634	FLI1	Friend leukemia virus integration 1	AF327066
208748_s_at	0.000302657	2.26529	FLOT1	flotillin 1	AA507012
213819_s_at	4.05613e-05	1.59461	FLOT1	flotillin 1	H45696
211299_s_at	1.99468e-06	2.71222	FLOT2	flotillin 2	BC003683
206674_at	0.00897691	-1.9555	FLT3	fms-related tyrosine kinase 3	NM_004119
206980_s_at	0.000246392	2.37605	FLT3LG	fms-related tyrosine kinase 3 ligand	NM_001459
210607_at	0.00675332	2.12449	FLT3LG	fms-related tyrosine kinase 3 ligand	U03858
219316_s_at	0.00167655	-2.88511	FLVCR2	feline leukemia virus subgroup C cellular receptor family, member 2	NM_017791
219112_at	0.000572784	1.7867	FNIP1///RAPGEF6	folliculin interacting protein 1///Rap guanine nucleotide exchange factor (GEF) 6	NM_016340
205021_s_at	2.29671e-05	1.65267	FOXN3	forkhead box N3	AA860806
208782_at	0.0113827	-2.41329	FSTL1	follistatin-like 1	BC000055
202838_at	0.00139615	-2.26039	FUCA1	fucosidase, alpha-L- 1, tissue	NM_000147
217370_x_at	1.70383e-05	1.93246	FUS	fused in sarcoma	S75762
209892_at	0.000915701	-1.89728	FUT4	fucosyltransferase 4 (alpha (1,3) fucosyltransferase, myeloid-specific)	AF305083
209893_s_at	0.000406729	-1.65586	FUT4	fucosyltransferase 4 (alpha (1,3) fucosyltransferase, myeloid-specific)	M58596
201635_s_at	0.00122507	2.08236	FXR1	fragile X mental retardation, autosomal homolog 1	NM_005087
218084_x_at	0.00119026	1.645	FXYD5	FXYD domain containing ion transport regulator 5	NM_014164
205285_s_at	3.66582e-07	3.39577	FYB	FYN binding protein	AI633888
216033_s_at	0.00196444	1.56114	FYN	FYN oncogene related to SRC, FGR, YES	S74774
204451_at	0.000352469	-3.50595	FZD1	frizzled family receptor 1	NM_003505
210220_at	0.00785039	-2.09734	FZD2	frizzled family receptor 2	L37882
221245_s_at	0.000155191	-1.52028	FZD5	frizzled family receptor 5	NM_030804
213560_at	0.00246005	1.54265	GADD45B	growth arrest and DNA-damage-inducible, beta	AV658684
212256_at	0.00110142	-1.56827	GALNT10	UDP-N-acetyl-alpha-D-galactosamine:polypeptide N-acetylgalactosaminyltransferase 10 (GalNAc-T10)	BE906572
217788_s_at	0.000345813	-1.57977	GALNT2	UDP-N-acetyl-alpha-D-galactosamine:polypeptide N-acetylgalactosaminyltransferase 2 (GalNAc-T2)	NM_004481
219956_at	1.752e-05	-2.29763	GALNT6	UDP-N-acetyl-alpha-D-galactosamine:polypeptide N-acetylgalactosaminyltransferase 6 (GalNAc-T6)	NM_007210
217445_s_at	0.00221823	1.63613	GART	phosphoribosylglycinamide formyltransferase, phosphoribosylglycinamide synthetase, phosphoribosylaminoimidazole synthetase	AF008655
31874_at	0.00433576	-3.93426	GAS2L1	growth arrest-specific 2 like 1	Y07846
209729_at	0.00329209	-1.95718	GAS2L1	growth arrest-specific 2 like 1	BC001782
211067_s_at	0.00555969	-2.0315	GAS7	growth arrest-specific 7	BC006454
202191_s_at	0.00465536	-1.9581	GAS7	growth arrest-specific 7	BE439987
202192_s_at	0.015651	-1.64126	GAS7	growth arrest-specific 7	NM_005890
214718_at	5.94057e-05	-1.86395	GATAD1	GATA zinc finger domain containing 1	AK026142
213018_at	0.000192332	-1.83923	GATAD1	GATA zinc finger domain containing 1	AI337901
208503_s_at	0.000321769	-1.57722	GATAD1	GATA zinc finger domain containing 1	NM_021167
202269_x_at	0.00577479	-1.76911	GBP1	guanylate binding protein 1, interferon-inducible	NM_002053
204224_s_at	0.005648	-1.58644	GCH1	GTP cyclohydrolase 1	NM_000161
205505_at	0.00519121	-1.55776	GCNT1	glucosaminyl (N-acetyl) transferase 1, core 2	NM_001490
214190_x_at	5.5014e-07	3.181	GGA2	golgi-associated, gamma adaptin ear containing, ARF binding protein 2	AI799984
208915_s_at	0.000743719	1.54935	GGA2	golgi-associated, gamma adaptin ear containing, ARF binding protein 2	AF190863
214005_at	0.000139916	-1.50276	GGCX	gamma-glutamyl carboxylase	BE326952
215352_at	0.0157858	1.88544	GIMAP1-GIMAP5///GIMAP5	GIMAP1-GIMAP5 readthrough///GTPase, IMAP family member 5	AL080068
214430_at	0.00954908	-1.70837	GLA	galactosidase, alpha	NM_000169
204836_at	0.014938	-1.64555	GLDC	glycine dehydrogenase (decarboxylating)	NM_000170
219933_at	0.00256589	-1.7111	GLRX2	glutaredoxin 2	NM_016066
221510_s_at	1.04728e-05	1.64115	GLS	glutaminase	AI828035
221628_s_at	6.52703e-07	2.20025	GLYR1	glyoxylate reductase 1 homolog (Arabidopsis)	AF326966
204875_s_at	0.00558534	-1.56637	GMDS	GDP-mannose 4,6-dehydratase	NM_001500
205349_at	0.00301301	-2.70029	GNA15	guanine nucleotide binding protein (G protein), alpha 15 (Gq class)	NM_002068
201040_at	3.60406e-05	2.24068	GNAI2	guanine nucleotide binding protein (G protein), alpha inhibiting activity polypeptide 2	NM_002070
211426_x_at	0.000434659	1.80356	GNAQ	guanine nucleotide binding protein (G protein), q polypeptide	U40038
200745_s_at	0.000303766	-1.53053	GNB1	guanine nucleotide binding protein (G protein), beta polypeptide 1	AF070603
46947_at	3.56448e-05	-1.58426	GNL3L	guanine nucleotide binding protein-like 3 (nucleolar)-like	T87245
212334_at	0.00101954	-2.04488	GNS	glucosamine (N-acetyl)-6-sulfatase	AW167793
212335_at	0.0022704	-1.89943	GNS	glucosamine (N-acetyl)-6-sulfatase	AW167793
208797_s_at	3.46039e-05	3.75827	GOLGA8A	golgin A8 family, member A	AF204231
208798_x_at	0.00933896	1.50573	GOLGA8A	golgin A8 family, member A	AF204231
210424_s_at	2.90759e-05	2.6	GOLGA8A///GOLGA8B	golgin A8 family, member A///golgin A8 family, member B	AF164622
210425_x_at	0.00106026	1.87608	GOLGA8A///GOLGA8B	golgin A8 family, member A///golgin A8 family, member B	AF164622
213650_at	0.0127023	1.57699	GOLGA8A///GOLGA8B	golgin A8 family, member A///golgin A8 family, member B	AW006438
217771_at	0.000184964	-3.09045	GOLM1	golgi membrane protein 1	NM_016548
212487_at	0.000140035	2.25823	GPATCH8	G patch domain containing 8	AI673812
211979_at	2.55806e-08	-1.52604	GPR107	G protein-coupled receptor 107	AB046844
221140_s_at	0.000646778	1.63612	GPR132	G protein-coupled receptor 132	NM_013345
208524_at	0.000495794	1.51898	GPR15	G protein-coupled receptor 15	NM_005290
204793_at	0.0116371	1.63499	GPRASP1	G protein-coupled receptor associated sorting protein 1	NM_014710
212856_at	0.00019596	-1.69024	GRAMD4	GRAM domain containing 4	AB018310
206620_at	0.00181124	1.6287	GRAP	GRB2-related adaptor protein	NM_006613
209409_at	0.011959	-1.60848	GRB10	growth factor receptor-bound protein 10	D86962
206204_at	0.00071027	-1.57115	GRB14	growth factor receptor-bound protein 14	NM_004490
211543_s_at	0.000747182	1.64422	GRK6	G protein-coupled receptor kinase 6	AF040752
221917_s_at	4.05808e-07	2.27654	GRSF1	G-rich RNA sequence binding factor 1	BF058465
215659_at	0.0102091	-1.71503	GSDMB	gasdermin B	AK025174
214040_s_at	0.00476752	1.51294	GSN	gelsolin	BE675337
210912_x_at	0.000759104	1.93404	GSTM4	glutathione S-transferase mu 4	M99422
201470_at	0.00326246	-1.69782	GSTO1	glutathione S-transferase omega 1	NM_004832
200824_at	0.00414495	-1.5855	GSTP1	glutathione S-transferase pi 1	NM_000852
209531_at	0.00331347	-1.57314	GSTZ1	glutathione S-transferase zeta 1	BC001453
210892_s_at	2.86986e-05	2.11189	GTF2I	general transcription factor IIi	BC004472
203817_at	0.00858978	-2.89133	GUCY1B3	guanylate cyclase 1, soluble, beta 3	W93728
202605_at	3.44703e-05	-1.53105	GUSB	glucuronidase, beta	NM_000181
215043_s_at	0.0118188	-1.82589	GUSBP3///GUSBP9///SMA4///SMA5	glucuronidase, beta pseudogene 3///glucuronidase, beta pseudogene 9///glucuronidase, beta pseudogene///glucuronidase, beta pseudogene	X83301
211275_s_at	0.000459773	-1.6518	GYG1	glycogenin 1	AF087942
214500_at	0.0140439	-1.71462	H2AFY	H2A histone family, member Y	AF044286
213826_s_at	0.000493715	2.13229	H3F3A	H3 histone, family 3A	AA292281
221892_at	0.000295762	-1.63458	H6PD	hexose-6-phosphate dehydrogenase (glucose 1-dehydrogenase)	AK024548
218450_at	0.000892895	-1.96351	HEBP1	heme binding protein 1	NM_015987
201944_at	0.0148787	-1.62895	HEXB	hexosaminidase B (beta polypeptide)	NM_000521
205221_at	0.00339151	-2.58495	HGD	homogentisate 1,2-dioxygenase	NM_000187
214308_s_at	0.00030165	-1.96514	HGD	homogentisate 1,2-dioxygenase	AI478172
209960_at	0.0118473	-2.63006	HGF	hepatocyte growth factor (hepapoietin A; scatter factor)	X16323
210997_at	0.00225185	-2.50803	HGF	hepatocyte growth factor (hepapoietin A; scatter factor)	M77227
210755_at	0.00448717	-2.00634	HGF	hepatocyte growth factor (hepapoietin A; scatter factor)	U46010
215933_s_at	0.00639773	-2.37974	HHEX	hematopoietically expressed homeobox	Z21533
204689_at	0.0141271	-2.11241	HHEX	hematopoietically expressed homeobox	NM_001529
212966_at	0.00198882	1.56964	HIC2	hypermethylated in cancer 2	AL043112
38340_at	0.00244586	1.50186	HIP1R	huntingtin interacting protein 1 related	AB014555
212291_at	9.53184e-07	2.56562	HIPK1	homeodomain interacting protein kinase 1	AI393355
214537_at	0.00209655	1.75941	HIST1H1D	histone cluster 1, H1d	NM_005320
214469_at	0.00137797	-2.10352	HIST1H2AB///HIST1H2AE	histone cluster 1, H2ab///histone cluster 1, H2ae	NM_021052
207156_at	0.0143847	-2.06764	HIST1H2AG///HIST1H2AH///HIST1H2AI///HIST1H2AK///HIST1H2AL///HIST1H2AM	histone cluster 1, H2ag///histone cluster 1, H2ah///histone cluster 1, H2ai///histone cluster 1, H2ak///histone cluster 1, H2al///histone cluster 1, H2am	NM_021064
205936_s_at	0.00424851	-2.31203	HK3	hexokinase 3 (white cell)	NM_002115
200751_s_at	4.55729e-07	1.74799	HNRNPC	heterogeneous nuclear ribonucleoprotein C (C1/C2)	BE898861
213472_at	2.37493e-09	5.96795	HNRNPH1	heterogeneous nuclear ribonucleoprotein H1 (H)	AI022387
213470_s_at	0.000346555	1.6858	HNRNPH1	heterogeneous nuclear ribonucleoprotein H1 (H)	BF983406
214918_at	0.015951	-1.59798	HNRNPM	heterogeneous nuclear ribonucleoprotein M	AK024911
216855_s_at	1.34387e-06	2.42505	HNRNPU	heterogeneous nuclear ribonucleoprotein U (scaffold attachment factor A)	D13413
209675_s_at	0.00160303	1.71917	HNRNPUL1	heterogeneous nuclear ribonucleoprotein U-like 1	BC004242
66053_at	0.000264395	1.66758	HNRNPUL2///HNRNPUL2-BSCL2	heterogeneous nuclear ribonucleoprotein U-like 2///HNRNPUL2-BSCL2 readthrough	AI738452
204647_at	0.000501193	-2.02608	HOMER3	homer homolog 3 (Drosophila)	NM_004838
217354_s_at	9.15703e-07	1.61624	HPS1	Hermansky-Pudlak syndrome 1	AL022313
204544_at	0.00338706	-1.64515	HPS5	Hermansky-Pudlak syndrome 5	NM_007216
219983_at	0.00821892	-1.60004	HRASLS	HRAS-like suppressor	NM_020386
200941_at	9.56184e-05	-1.84103	HSBP1	heat shock factor binding protein 1	AK026575
200942_s_at	0.00946704	-1.71099	HSBP1	heat shock factor binding protein 1	NM_001537
201413_at	0.00671865	-1.58325	HSD17B4	hydroxysteroid (17-beta) dehydrogenase 4	NM_000414
211220_s_at	0.00691479	1.60782	HSF2	heat shock transcription factor 2	BC005329
211968_s_at	1.96696e-05	1.55659	HSP90AA1	heat shock protein 90kDa alpha (cytosolic), class A member 1	AI962933
214359_s_at	0.000403454	1.87359	HSP90AB1	heat shock protein 90kDa alpha (cytosolic), class B member 1	AI218219
216450_x_at	2.52566e-05	3.76157	HSP90B1	heat shock protein 90kDa beta (Grp94), member 1	AK025862
211016_x_at	2.33042e-09	2.6951	HSPA4	heat shock 70kDa protein 4	BC002526
210338_s_at	0.000368135	1.6672	HSPA8	heat shock 70kDa protein 8///small nucleolar RNA, C/D box 14C///small nucleolar RNA, C/D box 14D	AB034951
200806_s_at	3.6011e-06	2.36624	HSPD1	heat shock 60kDa protein 1 (chaperonin)	BE256479
209448_at	5.43465e-05	-1.55414	HTATIP2	HIV-1 Tat interactive protein 2, 30kDa	BC002439
202601_s_at	1.15157e-05	2.23115	HTATSF1	HIV-1 Tat specific factor 1	AI373539
207194_s_at	0.00763604	-2.12737	ICAM4	intercellular adhesion molecule 4 (Landsteiner-Wiener blood group)	NM_001544
210439_at	0.000536338	2.76512	ICOS	inducible T-cell co-stimulator	AB023135
201193_at	0.00753579	-2.22866	IDH1	isocitrate dehydrogenase 1 (NADP+), soluble	NM_005896
220703_at	0.00301384	1.70399	IDI2-AS1	IDI2 antisense RNA 1	NM_018470
214453_s_at	0.00497137	-1.56074	IFI44	interferon-induced protein 44	NM_006417
204439_at	0.0132744	-1.87911	IFI44L	interferon-induced protein 44-like	NM_006820
219209_at	0.00274556	-1.68336	IFIH1	interferon induced with helicase C domain 1	NM_022168
216020_at	0.000302425	-1.49987	IFIH1	interferon induced with helicase C domain 1	AL080107
211405_x_at	0.00335999	1.59091	IFNA17	interferon, alpha 17	NM_021268
218847_at	0.000459986	-2.07305	IGF2BP2	insulin-like growth factor 2 mRNA binding protein 2	NM_006548
203819_s_at	0.00159193	-3.32637	IGF2BP3	insulin-like growth factor 2 mRNA binding protein 3	AU160004
203820_s_at	0.00816054	-2.16321	IGF2BP3	insulin-like growth factor 2 mRNA binding protein 3	NM_006547
201508_at	0.000745568	1.5293	IGFBP4	insulin-like growth factor binding protein 4	NM_001552
201162_at	0.00414423	-2.14789	IGFBP7	insulin-like growth factor binding protein 7	NM_001553
211637_x_at	0.0120784	2.58727	IGH///IGHA1///IGHA2///IGHD///IGHG1///IGHG3///IGHG4///IGHM///IGHV3-23///IGHV4-31	immunoglobulin heavy locus///immunoglobulin heavy constant alpha 1///immunoglobulin heavy constant alpha 2 (A2m marker)///immunoglobulin heavy constant delta///immunoglobulin heavy constant gamma 1 (G1m marker)///immunoglobulin heavy constant gamma 3 (G3m marker)///immunoglobulin heavy constant gamma 4 (G4m marker)///immunoglobulin heavy constant mu///immunoglobulin heavy variable 3-23///immunogl…	L23516
216557_x_at	0.014776	2.18561	IGHA1///IGHD///IGHG1///IGHG3///IGHM///IGHV4-31	immunoglobulin heavy constant alpha 1///immunoglobulin heavy constant delta///immunoglobulin heavy constant gamma 1 (G1m marker)///immunoglobulin heavy constant gamma 3 (G3m marker)///immunoglobulin heavy constant mu///immunoglobulin heavy variable 4-31	U92706
214973_x_at	0.0105994	2.57447	IGHD	immunoglobulin heavy constant delta	AJ275469
215621_s_at	0.00756967	2.2419	IGHD	immunoglobulin heavy constant delta	BG340670
217260_x_at	0.00137526	1.5124	IGHG1///SKAP2	immunoglobulin heavy constant gamma 1 (G1m marker)///src kinase associated phosphoprotein 2	AJ239383
216491_x_at	0.01217	2.6064	IGHM	immunoglobulin heavy constant mu	U80139
213550_s_at	0.000544681	1.72011	IK///TMCO6	IK cytokine, down-regulator of HLA II///transmembrane and coiled-coil domains 6	AA993683
211027_s_at	1.76261e-06	2.68575	IKBKB	inhibitor of kappa light polypeptide gene enhancer in B-cells, kinase beta	NM_001190720
216901_s_at	2.10341e-09	10.7901	IKZF1	IKAROS family zinc finger 1 (Ikaros)	S80876
205039_s_at	8.94002e-05	1.54198	IKZF1	IKAROS family zinc finger 1 (Ikaros)	BG540504
221092_at	7.6943e-05	4.5536	IKZF3	IKAROS family zinc finger 3 (Aiolos)	NM_012481
205067_at	0.015	1.52472	IL1B	interleukin 1, beta	NM_000576
204773_at	0.00491561	1.56429	IL11RA	interleukin 11 receptor, alpha	AY532110
205992_s_at	0.00949762	-2.3101	IL15	interleukin 15	NM_000585
217371_s_at	0.0112331	-1.99597	IL15	interleukin 15	Y09908
206295_at	0.00777692	-2.46835	IL18	interleukin 18 (interferon-gamma-inducing factor)	NM_001562
206569_at	5.05696e-06	2.84425	IL24	interleukin 24	NM_006850
211269_s_at	0.00298886	1.86447	IL2RA	interleukin 2 receptor, alpha	K03122
204116_at	4.45003e-05	1.84383	IL2RG	interleukin 2 receptor, gamma	NM_000206
203828_s_at	0.00280851	2.09642	IL32	interleukin 32	NM_004221
203233_at	0.014	1.50093	IL4R	interleukin 4 receptor	NM_000418
217489_s_at	2.72297e-05	1.78966	IL6R	interleukin 6 receptor	S72848
204863_s_at	0.000145399	4.51833	IL6ST	interleukin 6 signal transducer (gp130, oncostatin M receptor)	NM_002184
211000_s_at	0.00364553	3.03916	IL6ST	interleukin 6 signal transducer (gp130, oncostatin M receptor)	NM_002184
204864_s_at	5.77682e-06	2.33251	IL6ST	interleukin 6 signal transducer (gp130, oncostatin M receptor)	NM_002184
205798_at	0.0113085	1.5459	IL7R	interleukin 7 receptor	NM_002185
202794_at	0.0125207	-1.52971	INPP1	inositol polyphosphate-1-phosphatase	NM_002194
208364_at	3.72864e-06	2.98283	INPP4A	inositol polyphosphate-4-phosphatase, type I, 107kDa	NM_001566
201598_s_at	0.00101121	-1.54289	INPPL1	inositol polyphosphate phosphatase-like 1	NM_001567
213792_s_at	0.000928202	-1.6303	INSR	insulin receptor	AA485908
211952_at	0.000678598	-1.84802	IPO5	importin 5	AF339834
221974_at	0.0104089	1.75928	IPW///LOC100506948///SNORD107///SNORD115-13///SNORD115-26///SNORD115-7///SNORD116-28///SNRPN	imprinted in Prader-Willi syndrome (non-protein coding)///uncharacterized LOC100506948///small nucleolar RNA, C/D box 107///small nucleolar RNA, C/D box 115-13///small nucleolar RNA, C/D box 115-26///small nucleolar RNA, C/D box 115-7///small nucleolar RNA, C/D box 116-28///small nuclear ribonucleoprotein polypeptide N	AW770748
213447_at	0.0113437	1.508	IPW///LOC100506948///SNORD107///SNORD115-13///SNORD115-26///SNORD115-7///SNORD116-28///SNRPN	imprinted in Prader-Willi syndrome (non-protein coding)///uncharacterized LOC100506948///small nucleolar RNA, C/D box 107///small nucleolar RNA, C/D box 115-13///small nucleolar RNA, C/D box 115-26///small nucleolar RNA, C/D box 115-7///small nucleolar RNA, C/D box 116-28///small nuclear ribonucleoprotein polypeptide N	AI672541
204202_at	0.000128914	-1.5536	IQCE	IQ motif containing E	NM_017604
202621_at	0.000132846	1.67388	IRF3	interferon regulatory factor 3	NM_001571
205468_s_at	0.0151836	1.51827	IRF5	interferon regulatory factor 5	NM_03264335					gb:AI028035 /DB_XREF=gi:3245344 /DB_XREF=oy73d03.x1 /CLONE=IMAGE:1671461 /FEA=FLmRNA /CNT=47 /TID=Hs.54434.0 /TIER=Stack /STK=15 /UG=Hs.54434 /LL=3663 /UG_GENE=IRF5 /UG_TITLE=interferon regulatory factor 5 /FL=gb:NM_002200.1 gb:U51127.1
208436_s_at	0.00455846	-1.50429	IRF7	interferon regulatory factor 7	NM_004030
208114_s_at	0.000197882	-1.53477	ISG20L2	interferon stimulated exonuclease gene 20kDa-like 2	NM_030980
206493_at	0.00847311	-2.27903	ITGA2B	integrin, alpha 2b (platelet glycoprotein IIb of IIb/IIIa complex, antigen CD41)	NM_000419
201656_at	0.000466506	2.31482	ITGA6	integrin, alpha 6	NM_000210
215177_s_at	0.000866177	2.00673	ITGA6	integrin, alpha 6	AV733308
205786_s_at	0.00274296	-1.50219	ITGAM	integrin, alpha M (complement component 3 receptor 3 subunit)	NM_000632
202803_s_at	0.0013022	-1.65967	ITGB2	integrin, beta 2 (complement component 3 receptor 3 and 4 subunit)	NM_000211
214020_x_at	0.0100069	-1.78154	ITGB5	integrin, beta 5	AI335208
211339_s_at	0.000795895	1.77611	ITK	IL2-inducible T-cell kinase	D13720
201188_s_at	0.00817967	1.51956	ITPR3	inositol 1,4,5-trisphosphate receptor, type 3	NM_002224
209298_s_at	0.000644502	-2.2152	ITSN1	intersectin 1 (SH3 domain protein)	AF114488
209297_at	0.000837561	-1.51865	ITSN1	intersectin 1 (SH3 domain protein)	AF114488
205841_at	0.00135407	-2.16538	JAK2	Janus kinase 2	NM_004972
205842_s_at	0.00126852	-2.06788	JAK2	Janus kinase 2	AF001362
207187_at	1.09193e-06	1.76564	JAK3	Janus kinase 3	NM_000215
211108_s_at	0.000100027	1.70729	JAK3	Janus kinase 3	U31601
60528_at	0.000634849	1.53303	JMJD7///JMJD7-PLA2G4B///PLA2G4B	jumonji domain containing 7///JMJD7-PLA2G4B readthrough///phospholipase A2, group IVB (cytosolic)	N71116
213281_at	0.00732457	3.071	JUN	jun proto-oncogene	NM_002228.3
203751_x_at	0.00344524	3.02346	JUND	jun D proto-oncogene	NM_005354
214326_x_at	0.00176246	2.64886	JUND	jun D proto-oncogene	AI339541
203752_s_at	0.011231	1.91843	JUND	jun D proto-oncogene	NM_005354
216361_s_at	1.11348e-05	3.99238	KAT6A	K(lysine) acetyltransferase 6A	AJ251844
220727_at	0.00170252	-1.51614	KCNK10	potassium channel, subfamily K, member 10	NM_021161
214849_at	1.8826e-05	1.68548	KCTD20	potassium channel tetramerisation domain containing 20	AW500220
200922_at	0.000430316	1.56005	KDELR1	KDEL (Lys-Asp-Glu-Leu) endoplasmic reticulum protein retention receptor 1	NM_006801
200699_at	0.00636495	-1.86496	KDELR2	KDEL (Lys-Asp-Glu-Leu) endoplasmic reticulum protein retention receptor 2	AL542253
203990_s_at	0.000896605	2.34238	KDM6A	lysine (K)-specific demethylase 6A	AI140752
41386_i_at	0.0110108	1.70624	KDM6B	lysine (K)-specific demethylase 6B	AB002344
202417_at	0.00282877	-1.52658	KEAP1	kelch-like ECH-associated protein 1	NM_012289
201728_s_at	5.7868e-05	1.67427	KIAA0100	KIAA0100	AA904674
204546_at	0.00358451	-1.66793	KIAA0513	KIAA0513	NM_014732
212421_at	0.00134508	-2.34983	KIAA0930	KIAA0930	AW468871
216294_s_at	0.000116643	1.73665	KIAA1109	KIAA1109	AL137254
213623_at	0.000410769	1.70411	KIF3A	kinesin family member 3A	NM_007054
202393_s_at	0.00892147	-1.91563	KLF10	Kruppel-like factor 10	NM_005655
218486_at	0.000393361	-1.89151	KLF11	Kruppel-like factor 11	AA149594
206966_s_at	6.96104e-05	1.83053	KLF12	Kruppel-like factor 12	AH010423
219878_s_at	2.99428e-05	1.89074	KLF13	Kruppel-like factor 13	NM_015995
221837_at	8.82733e-06	1.57241	KLHL22	kelch-like family member 22	N38751
221221_s_at	0.00285186	1.60996	KLHL3	kelch-like family member 3	NM_017415
210690_at	0.000754786	2.23159	KLRC4	killer cell lectin-like receptor subfamily C, member 4	NM_01343
212079_s_at	4.73674e-05	3.55337	KMT2A	lysine (K)-specific methyltransferase 2A	AA715041
212078_s_at	0.000163555	1.7893	KMT2A	lysine (K)-specific methyltransferase 2A	AA704766
212103_at	4.55721e-05	-1.51001	KPNA6	karyopherin alpha 6 (importin alpha 7)	BG403834
219955_at	0.0142109	-1.51254	L1TD1	LINE-1 type transposase domain containing 1	NM_019079
205116_at	0.00151682	-1.52382	LAMA2	laminin, alpha 2	NM_000426
201720_s_at	9.16156e-06	1.80099	LAPTM5	lysosomal protein transmembrane 5	AI589086
212193_s_at	7.2123e-07	2.1167	LARP1	La ribonucleoprotein domain family, member 1	BE881529
210966_x_at	5.07271e-07	1.68929	LARP1	La ribonucleoprotein domain family, member 1	BC001460
214216_s_at	4.81495e-06	1.68443	LARP4B	La ribonucleoprotein domain family, member 4B	AW628686
221011_s_at	0.00777136	1.75203	LBH	limb bud and heart development	NM_030915
204890_s_at	7.48184e-05	2.05224	LCK	lymphocyte-specific protein tyrosine kinase	U07236
204891_s_at	0.000954386	1.60663	LCK	lymphocyte-specific protein tyrosine kinase	NM_005356
35160_at	2.09122e-07	1.51552	LDB1	LIM domain binding 1	AF064491
201030_x_at	0.00668304	1.50559	LDHB	lactate dehydrogenase B	NM_002300
202068_s_at	0.000912035	-2.31122	LDLR	low density lipoprotein receptor	NM_000527
202067_s_at	0.000391053	-1.64436	LDLR	low density lipoprotein receptor	AI861942
210948_s_at	0.000278482	3.83216	LEF1	lymphoid enhancer-binding factor 1	AF294627
221558_s_at	0.00613557	1.9758	LEF1	lymphoid enhancer-binding factor 1	AF288571
209894_at	0.00212641	-2.09739	LEPR	leptin receptor	U50748
202378_s_at	0.00166445	-1.74941	LEPROT	leptin receptor overlapping transcript	NM_017526
202377_at	0.00747653	-1.70398	LEPROT	leptin receptor overlapping transcript	AW026535
202595_s_at	0.00155198	1.90447	LEPROTL1	leptin receptor overlapping transcript-like 1	BC000642
202594_at	0.00120252	1.55125	LEPROTL1	leptin receptor overlapping transcript-like 1	NM_015344
201105_at	0.0149	-1.91693	LGALS1	lectin, galactoside-binding, soluble, 1	NM_002305
208949_s_at	0.00943727	-2.07788	LGALS3	lectin, galactoside-binding, soluble, 3	BC001120
212658_at	0.00691827	-1.55537	LHFPL2	lipoma HMGIC fusion partner-like 2	N66633
210660_at	0.00848633	-2.81124	LILRA1	leukocyte immunoglobulin-like receptor, subfamily A (with TM domain), member 1	NM_001278319
207857_at	0.0155388	-2.35195	LILRA2	leukocyte immunoglobulin-like receptor, subfamily A (with TM domain), member 2	NM_006866
206881_s_at	0.0131558	-2.96283	LILRA3	leukocyte immunoglobulin-like receptor, subfamily A (without TM domain), member 3	NM_006865
210313_at	0.00309553	-1.83164	LILRA4	leukocyte immunoglobulin-like receptor, subfamily A (with TM domain), member 4	NM_012276
215838_at	0.0121629	-3.15289	LILRA5	leukocyte immunoglobulin-like receptor, subfamily A (with TM domain), member 5	NM_181985
210784_x_at	0.0117883	-1.74256	LILRA6///LILRB3	leukocyte immunoglobulin-like receptor, subfamily A (with TM domain), member 6///leukocyte immunoglobulin-like receptor, subfamily B (with TM and ITIM domains), member 3	NM_024318
210225_x_at	0.0112728	-1.6438	LILRA6///LILRB3	leukocyte immunoglobulin-like receptor, subfamily A (with TM domain), member 6///leukocyte immunoglobulin-like receptor, subfamily B (with TM and ITIM domains), member 3	NM_024318
210146_x_at	0.00361906	-3.40905	LILRB2	leukocyte immunoglobulin-like receptor, subfamily B (with TM and ITIM domains), member 2	AF004231
210152_at	0.00704893	-1.8303	LILRB4	leukocyte immunoglobulin-like receptor, subfamily B (with TM and ITIM domains), member 4	NM_001278426
212687_at	0.00134334	-1.8452	LIMS1	LIM and senescent cell antigen-like domains 1	AL110164
220701_at	0.00151224	1.5962	LINC00216	long intergenic non-protein coding RNA 216	NM_018587
AFFX-HUMRGE/M10098_5_at	5.22692e-07	1.81633	LINC00273	long intergenic non-protein coding RNA 273	AFFX-HUMRGE/M10098_5
213703_at	0.0129834	1.52494	LINC00342	long intergenic non-protein coding RNA 342	W95043
201847_at	0.010259	-1.7695	LIPA	lipase A, lysosomal acid, cholesterol esterase	NM_000235
203294_s_at	3.95789e-07	2.18094	LMAN1	lectin, mannose-binding, 1	U09716
203293_s_at	1.45739e-05	1.8636	LMAN1	lectin, mannose-binding, 1	NM_005570
203411_s_at	0.003664	-1.62502	LMNA	lamin A/C	NM_005572
209204_at	2.90917e-06	-1.86859	LMO4	LIM domain only 4	AI824831
211050_x_at	0.000154242	2.25654	LOC100132055///LOC100134822///LOC100288069///LOC100996442///LOC100996554	uncharacterized LOC100132055///uncharacterized LOC100134822///general transcription factor IIi pseudogene///uncharacterized LOC100996442///uncharacterized LOC100996554	BC006361
214984_at	0.00413077	1.56141	LOC100271836///LOC101060596///SLC7A5P1	smg-1 homolog, phosphatidylinositol 3-kinase-related kinase (C. elegans) pseudogene///serine/threonine-protein kinase SMG1-like///solute carrier family 7 (amino acid transporter light chain, L system), member 5 pseudogene 1	AC003007
221973_at	0.00171157	1.91591	LOC100506076///LOC100506123	uncharacterized LOC100506076///uncharacterized LOC100506123	AI983904
59433_at	0.00137715	1.82535	LOC100506453///LOC389906///LOC441528	uncharacterized LOC100506453///zinc finger protein 839 pseudogene///uncharacterized LOC441528	N32185
214807_at	0.00201245	-2.57305	LOC100509635	uncharacterized LOC100509635	AI278204
212758_s_at	0.000171579	2.31507	LOC100996668///ZEB1	uncharacterized LOC100996668///zinc finger E-box binding homeobox 1	AI373166
210875_s_at	0.013355	1.90109	LOC100996668///ZEB1	uncharacterized LOC100996668///zinc finger E-box binding homeobox 1	U12170
212764_at	0.00945205	1.77041	LOC100996668///ZEB1	uncharacterized LOC100996668///zinc finger E-box binding homeobox 1	AI373166
212392_s_at	0.0037699	1.57887	LOC100996724///LOC100996761///LOC101060291///LOC101060344///LOC101060353///LOC101060463///LOC101060582///LOC728802///PDE4DIP	myomegalin-like///myomegalin-like///myomegalin-like///uncharacterized LOC101060344///myomegalin-like///myomegalin-like///myomegalin-like///myomegalin-like///phosphodiesterase 4D interacting protein	AI950145
219730_at	0.000453839	-3.82366	LOC100996782///MED18	mediator of RNA polymerase II transcription subunit 18-like///mediator complex subunit 18	NM_017638
214693_x_at	0.00600346	1.50037	LOC101059961///LOC101060202///LOC101060362///LOC101060684///NBPF10///NBPF12///NBPF9	neuroblastoma breakpoint family member 21-like///neuroblastoma breakpoint family member 20-like///neuroblastoma breakpoint family member 20-like///neuroblastoma breakpoint family member 20-like///neuroblastoma breakpoint family, member 10///neuroblastoma breakpoint family, member 12///neuroblastoma breakpoint family, member 9	BE732345
215002_at	0.000241687	1.83488	LOC101060275///LOC101060455///LOC101060564///LOC595101///LOC613037///NPIPB11///NPIPB3///NPIPB4///NPIPB5	putative NPIP-like protein LOC100132247-like///serine/threonine-protein kinase SMG1-like///nuclear pore complex-interacting protein-like 3-like///smg-1 homolog, phosphatidylinositol 3-kinase-related kinase (C. elegans) pseudogene///nuclear pore complex interacting protein pseudogene///nuclear pore complex interacting protein family, member B11///nuclear pore complex interacting protein family, me…	BE000837
217602_at	1.44536e-05	3.72962	LOC101060363///PPIA	peptidyl-prolyl cis-trans isomerase A-like///peptidylprolyl isomerase A (cyclophilin A)	AI191118
214870_x_at	0.000227887	1.73878	LOC101060412///NPIPA1///NPIPA2///NPIPA3///NPIPA5///NPIPA7///NPIPA8///PKD1P1	nuclear pore complex-interacting protein-like///nuclear pore complex interacting protein family, member A1///nuclear pore complex interacting protein family, member A2///nuclear pore complex interacting protein family, member A3///nuclear pore complex interacting protein family, member A5///nuclear pore complex interacting protein family, member A7///nuclear pore complex interacting protein famil…	AC002045
201008_s_at	0.00344476	1.66926	LOC101060503///TXNIP	thioredoxin-interacting protein-like///thioredoxin interacting protein	NM_006472
209607_x_at	0.0133451	-1.54774	LOC101060714///SLX1A-SULT1A3///SLX1B-SULT1A4///SULT1A3///SULT1A4	sulfotransferase 1A3/1A4-like///SLX1A-SULT1A3 readthrough (NMD candidate)///SLX1B-SULT1A4 readthrough (NMD candidate)///sulfotransferase family, cytosolic, 1A, phenol-preferring, member 3///sulfotransferase family, cytosolic, 1A, phenol-preferring, member 4	U08032
214035_x_at	0.00011647	1.71236	LOC399491	GPS, PLAT and transmembrane domain-containing protein	AA308853
205787_x_at	0.00944558	1.89166	LOC441155///ZC3H11A	zinc finger CCCH-type domain-containing-like///zinc finger CCCH-type containing 11A	AI803216
202998_s_at	0.00615659	1.5621	LOXL2	lysyl oxidase-like 2	AF117949
204036_at	0.0117151	-2.53369	LPAR1	lysophosphatidic acid receptor 1	AW269335
206722_s_at	0.00771798	1.64045	LPAR2	lysophosphatidic acid receptor 2	AF011466
202651_at	0.000911663	-1.54991	LPGAT1	lysophosphatidylglycerol acyltransferase 1	NM_014873
212272_at	2.77134e-05	1.72468	LPIN1	lipin 1	AA813260
202821_s_at	0.000349103	1.55454	LPP	LIM domain containing preferred translocation partner in lipoma	AL044018
219631_at	0.00928818	-1.64119	LRP12	low density lipoprotein receptor-related protein 12	NM_024937
201186_at	1.87443e-05	-1.52681	LRPAP1	low density lipoprotein receptor-related protein associated protein 1	NM_002337
220219_s_at	0.0020967	1.50042	LRRC37A///LRRC37A2///LRRC37A3///LRRC37A4P	leucine rich repeat containing 37A///leucine rich repeat containing 37, member A2///leucine rich repeat containing 37, member A3///leucine rich repeat containing 37, member A4, pseudogene	NM_018001
220220_at	1.11545e-05	4.3286	LRRC37A4P	leucine rich repeat containing 37, member A4, pseudogene	NM_018001
222231_s_at	0.0002871	-1.60138	LRRC59	leucine rich repeat containing 59	AK025328
218364_at	0.00015652	-1.63798	LRRFIP2	leucine rich repeat (in FLII) interacting protein 2	NM_017724
220610_s_at	0.000167465	-1.62548	LRRFIP2	leucine rich repeat (in FLII) interacting protein 2	NM_006309
212529_at	8.14242e-07	1.62484	LSM12	LSM12 homolog (S. cerevisiae)	BF197707
208190_s_at	0.00539886	1.82333	LSR	lipolysis stimulated lipoprotein receptor	NM_015925
208771_s_at	0.00510429	-1.70359	LTA4H	leukotriene A4 hydrolase	J02959
203005_at	0.00574974	-1.92243	LTBR	lymphotoxin beta receptor (TNFR superfamily, member 3)	NM_002342
215967_s_at	0.00012455	2.07513	LY9	lymphocyte antigen 9	NM_002348
210370_s_at	4.18606e-05	2.05215	LY9	lymphocyte antigen 9	NM_002348
202626_s_at	0.00363987	-2.22109	LYN	v-yes-1 Yamaguchi sarcoma viral related oncogene homolog	AI356412
210754_s_at	0.00772194	-1.98855	LYN	v-yes-1 Yamaguchi sarcoma viral related oncogene homolog	M79321
202625_at	0.0148025	-1.84042	LYN	v-yes-1 Yamaguchi sarcoma viral related oncogene homolog	AI356412
203007_x_at	0.000952626	-1.50044	LYPLA1	lysophospholipase I	AF077198
217692_at	0.000853757	1.52586	MAGOH2	mago-nashi homolog 2 (pseudogene)	AW469555
217920_at	0.0041583	-1.54166	MAN1A2	mannosidase, alpha, class 1A, member 2	BE543064
209166_s_at	0.00637667	-1.73914	MAN2B1	mannosidase, alpha, class 2B, member 1	U68567
213490_s_at	2.89097e-05	1.82865	MAP2K2	mitogen-activated protein kinase kinase 2	NM_030662
205699_at	0.00980452	1.61337	MAP2K6	mitogen-activated protein kinase kinase 6	U39657
214786_at	0.0127179	1.51596	MAP3K1	mitogen-activated protein kinase kinase kinase 1, E3 ubiquitin protein ligase	NM_005921
211081_s_at	9.82013e-06	2.47013	MAP4K5	mitogen-activated protein kinase kinase kinase kinase 5	Z25426
212497_at	0.000357982	1.92495	MAPK1IP1L	mitogen-activated protein kinase 1 interacting protein 1-like	AK025580
210671_x_at	1.03903e-06	2.33301	MAPK8	mitogen-activated protein kinase 8	NM_001278548
210477_x_at	6.77694e-05	1.87881	MAPK8	mitogen-activated protein kinase 8	NM_001278548
201461_s_at	0.0105705	1.84578	MAPKAPK2	mitogen-activated protein kinase-activated protein kinase 2	NM_004759
215050_x_at	0.00116111	1.72096	MAPKAPK2	mitogen-activated protein kinase-activated protein kinase 2	BG325734
202787_s_at	0.0155542	-1.56963	MAPKAPK3	mitogen-activated protein kinase-activated protein kinase 3	NM_004635
205819_at	0.000104609	-3.00596	MARCO	macrophage receptor with collagenous structure	NM_006770
211082_x_at	9.78546e-07	1.61927	MARK2	MAP/microtubule affinity-regulating kinase 2	Z25427
215903_s_at	7.26891e-05	-1.49967	MAST2	microtubule associated serine/threonine kinase 2	BE786598
222348_at	0.00122226	2.07827	MAST4	microtubule associated serine/threonine kinase family member 4	AW971134
200769_s_at	7.48415e-08	2.83293	MAT2A	methionine adenosyltransferase II, alpha	BC001686
216926_s_at	2.85269e-05	1.64455	MAU2	MAU2 chromatid cohesion factor homolog (C. elegans)	AC003030
210734_x_at	3.56909e-10	1.88293	MAX	MYC associated factor X	BC004516
208403_x_at	4.43276e-08	1.64531	MAX	MYC associated factor X	NM_002382
205018_s_at	5.5194e-05	1.78212	MBNL2	muscleblind-like splicing regulator 2	NM_005757
205017_s_at	5.55218e-06	1.54287	MBNL2	muscleblind-like splicing regulator 2	AI088145
219814_at	0.0135199	1.52766	MBNL3	muscleblind-like splicing regulator 3	NM_018388
212935_at	0.000376419	1.99744	MCF2L	MCF.2 cell line derived transforming sequence-like	AB002360
35147_at	4.02402e-05	1.87375	MCF2L	MCF.2 cell line derived transforming sequence-like	AB002360
200796_s_at	1.61809e-05	5.07913	MCL1	myeloid cell leukemia sequence 1 (BCL2-related)	BF594446
214056_at	6.93367e-05	2.45808	MCL1	myeloid cell leukemia sequence 1 (BCL2-related)	BF981280
214057_at	1.89476e-06	2.06539	MCL1	myeloid cell leukemia sequence 1 (BCL2-related)	H71805
213561_at	0.000502803	1.60882	MCM9	minichromosome maintenance complex component 9	BF062335
202556_s_at	0.000114377	1.5131	MCRS1	microspherule protein 1	NM_006337
220094_s_at	0.000607197	-1.89569	MCUR1	mitochondrial calcium uniporter regulator 1	NM_022102
217599_s_at	0.00266992	1.95531	MDFIC	MyoD family inhibitor domain containing	BE910600
205655_at	4.14306e-07	2.70589	MDM4	Mdm4 p53 binding protein homolog (mouse)	NM_002393
203496_s_at	0.000500651	1.95786	MED1	mediator complex subunit 1	AF055994
214778_at	6.18921e-05	-2.24111	MEGF8	multiple EGF-like-domains 8	AB011541
212830_at	0.00556307	-1.89646	MEGF9	multiple EGF-like-domains 9	W68084
220797_at	3.07602e-07	3.3004	METTL16	methyltransferase like 16	NM_024086
209703_x_at	2.29031e-06	-1.64707	METTL7A	methyltransferase like 7A	BC004492
205442_at	0.00880828	-3.95781	MFAP3L	microfibrillar-associated protein 3-like	NM_021647
216205_s_at	0.000991645	1.58067	MFN2	mitofusin 2	AK021947
204152_s_at	0.000120099	1.78382	MFNG	MFNG O-fucosylpeptide 3-beta-N-acetylglucosaminyltransferase	AI738965
218109_s_at	0.00749782	-1.76012	MFSD1	major facilitator superfamily domain containing 1	NM_022736
214269_at	0.000262441	-1.83562	MFSD7	major facilitator superfamily domain containing 7	AK025922
215524_x_at	9.00205e-05	2.67646	MGC40069///TRAC///TRAJ17///TRAV20	uncharacterized protein MGC40069///T cell receptor alpha constant///T cell receptor alpha joining 17///T cell receptor alpha variable 20	AW966434
200898_s_at	0.00126719	1.57771	MGEA5	meningioma expressed antigen 5 (hyaluronidase)	AK002091
211026_s_at	0.00828242	-1.994	MGLL	monoglyceride lipase	BC006230
217513_at	0.000326871	-2.48494	MILR1	mast cell immunoglobulin-like receptor 1	BG334495
222087_at	1.17971e-05	1.62335	MIR1204///PVT1	microRNA 1204///Pvt1 oncogene (non-protein coding)	AW451806
212016_s_at	0.00237454	1.97019	MIR4745///PTBP1	microRNA 4745///polypyrimidine tract binding protein 1	AA679988
200753_x_at	2.99598e-06	1.81968	MIR636///SRSF2	microRNA 636///serine/arginine-rich splicing factor 2	BE866585
218883_s_at	0.000794881	-1.82588	MLF1IP	MLF1 interacting protein	NM_024629
200948_at	0.000449104	2.14098	MLF2	myeloid leukemia factor 2	NM_005439
204838_s_at	0.00792187	-2.91472	MLH3	mutL homolog 3 (E. coli)	NM_014381
214525_x_at	0.00526022	-1.89896	MLH3	mutL homolog 3 (E. coli)	AB039667
217216_x_at	0.0105496	-1.85744	MLH3	mutL homolog 3 (E. coli)	AC006530
211789_s_at	0.000886582	1.63363	MLXIP	MLX interacting protein	AF312918
203414_at	0.000639923	-1.88398	MMD	monocyte to macrophage differentiation-associated	NM_012329
64883_at	0.00789786	-1.60703	MOSPD2	motile sperm domain containing 2	AI744083
218024_at	6.88548e-06	-1.5187	MPC1	mitochondrial pyruvate carrier 1	NM_016098
207550_at	0.00476559	-2.0275	MPL	myeloproliferative leukemia virus oncogene	NM_005373
203780_at	0.0158555	-2.3079	MPZL2	myelin protein zero-like 2	AF275945
204438_at	0.0119775	-2.03957	MRC1	mannose receptor, C type 1	NM_002438
219607_s_at	0.00721329	-5.40656	MS4A4A	membrane-spanning 4-domains, subfamily A, member 4A	NM_024021
218773_s_at	0.00567785	-1.64758	MSRB2	methionine sulfoxide reductase B2	NM_012228
219451_at	0.00436749	-1.53723	MSRB2	methionine sulfoxide reductase B2	NM_016064
211363_s_at	0.00124458	1.66287	MTAP	methylthioadenosine phosphorylase	AF109294
201761_at	0.00685277	-1.62274	MTHFD2	methylenetetrahydrofolate dehydrogenase (NADP+ dependent) 2, methenyltetrahydrofolate cyclohydrolase	NM_006636
214975_s_at	3.6841e-07	2.83622	MTMR1	myotubularin related protein 1	AK001816
210360_s_at	0.000564959	1.53826	MTSS1	metastasis suppressor 1	AF116674
212095_s_at	0.00942324	1.77331	MTUS1	microtubule associated tumor suppressor 1	BE552421
212093_s_at	0.0150651	1.51735	MTUS1	microtubule associated tumor suppressor 1	AI695017
202180_s_at	6.78698e-07	-1.76453	MVP	major vault protein	NM_017458
201959_s_at	0.0074253	1.50532	MYCBP2	MYC binding protein 2, E3 ubiquitin protein ligase	AA488899
202555_s_at	0.00443179	-3.16142	MYLK	myosin light chain kinase	NM_005965
203072_at	0.00344932	-1.69424	MYO1E	myosin IE	NM_004998
214765_s_at	0.00134218	-2.1302	NAAA	N-acylethanolamine acid amidase	AK024677
212993_at	0.0031642	-2.02923	NACC2	NACC family member 2, BEN and BTB (POZ) domain containing	AA114166
215159_s_at	0.0035554	1.69617	NADK	NAD kinase	AI239732
208917_x_at	0.0025523	1.65589	NADK	NAD kinase	BE674658
202944_at	0.00718153	-2.18328	NAGA	N-acetylgalactosaminidase, alpha-	NM_000262
218189_s_at	0.000764491	-1.8678	NANS	N-acetylneuraminic acid synthase	NM_018946
208751_at	0.000479452	2.21769	NAPA	N-ethylmaleimide-sensitive factor attachment protein, alpha	BC001165
206491_s_at	0.002358	1.58372	NAPA	N-ethylmaleimide-sensitive factor attachment protein, alpha	NM_003827
215434_x_at	0.000574393	1.67724	NBPF1	neuroblastoma breakpoint family, member 1	AV684285
218662_s_at	0.012271	-1.63112	NCAPG	non-SMC condensin I complex, subunit G	NM_022346
205731_s_at	5.44095e-07	1.90456	NCOA2	nuclear receptor coactivator 2	NM_006540
205732_s_at	0.00115805	1.55466	NCOA2	nuclear receptor coactivator 2	NM_006540
214279_s_at	0.00617513	1.53018	NDRG2	NDRG family member 2	W74452
202607_at	2.8236e-06	-1.97973	NDST1	N-deacetylase/N-sulfotransferase (heparan glucosaminyl) 1	AL526632
218160_at	0.00318166	-1.65322	NDUFA8	NADH dehydrogenase (ubiquinone) 1 alpha subcomplex, 8, 19kDa	NM_014222
221801_x_at	0.00183793	-1.53114	NEFL	neurofilament, light polypeptide	AL537457
214738_s_at	0.000348049	1.54576	NEK9	NIMA-related kinase 9	BE792298
218888_s_at	0.0074698	-2.02957	NETO2	neuropilin (NRP) and tolloid (TLL)-like 2	AI335263
211017_s_at	0.000633507	1.59169	NF2	neurofibromin 2 (merlin)	AF123570
204702_s_at	0.0127384	-2.13387	NFE2L3	nuclear factor (erythroid-derived 2)-like 3	NM_004289
203927_at	0.0010321	-1.67844	NFKBIE	nuclear factor of kappa light polypeptide gene enhancer in B-cells inhibitor, epsilon	NM_004556
204109_s_at	0.00523711	1.57016	NFYA	nuclear transcription factor Y, alpha	BF445142
216263_s_at	0.00600201	-1.57747	NGDN	neuroguidin, EIF4E binding protein	AK022215
202007_at	0.00801259	-5.22116	NID1	nidogen 1	BF940043
213918_s_at	7.02039e-06	1.51182	NIPBL	Nipped-B homolog (Drosophila)	BF221673
201708_s_at	1.50738e-05	1.87131	NIPSNAP1	nipsnap homolog 1 (C. elegans)	AW083371
218240_at	0.000152304	-1.59599	NKIRAS2	NFKB inhibitor interacting Ras-like 2	NM_017595
222105_s_at	0.00259436	-1.59414	NKIRAS2	NFKB inhibitor interacting Ras-like 2	AA452565
215339_at	2.13569e-05	2.57052	NKTR	natural killer-tumor recognition sequence	AI688640
215338_s_at	0.000232401	1.58724	NKTR	natural killer-tumor recognition sequence	AI688640
202379_s_at	0.000657592	1.50117	NKTR	natural killer-tumor recognition sequence	NM_005385
219147_s_at	0.00643715	1.54875	NMRK1	nicotinamide riboside kinase 1	NM_017881
211949_s_at	0.000573601	1.60468	NOLC1	nucleolar and coiled-body phosphoprotein 1	AI355279
208698_s_at	1.70583e-06	2.06817	NONO	non-POU domain containing, octamer-binding	BC002364
210470_x_at	2.0205e-07	2.06675	NONO	non-POU domain containing, octamer-binding	BC003129
202445_s_at	0.0135374	-1.5443	NOTCH2	notch 2	NM_024408
212377_s_at	0.00322242	-1.513	NOTCH2	notch 2	AU158495
211584_s_at	0.00895091	1.69197	NPAT	nuclear protein, ataxia-telangiectasia locus	U58852
200701_at	0.00786087	-1.95663	NPC2	Niemann-Pick disease, type C2	NM_006432
204538_x_at	0.000150949	1.82332	NPIPA1	nuclear pore complex interacting protein family, member A1	NM_006985
221501_x_at	0.000137606	1.83156	NPIPA2///NPIPA3///NPIPA5///PKD1P1	nuclear pore complex interacting protein family, member A2///nuclear pore complex interacting protein family, member A3///nuclear pore complex interacting protein family, member A5///polycystic kidney disease 1 (autosomal dominant) pseudogene 1	AF229069
215921_at	1.14152e-07	3.01432	NPIPB3	nuclear pore complex interacting protein family, member B3	AC002544
31637_s_at	1.44917e-05	1.5047	NR1D1///THRA	nuclear receptor subfamily 1, group D, member 1///thyroid hormone receptor, alpha	X72631
209750_at	0.00163568	1.66738	NR1D2	nuclear receptor subfamily 1, group D, member 2	N32859
209262_s_at	0.00379374	-1.54486	NR2F6	nuclear receptor subfamily 2, group F, member 6	BC002669
215093_at	3.70084e-05	-1.53571	NSDHL	NAD(P) dependent steroid dehydrogenase-like	U82671
200646_s_at	0.00518125	1.76436	NUCB1	nucleobindin 1	NM_006184
222027_at	0.00230176	1.88988	NUCKS1	nuclear casein kinase and cyclin-dependent kinase substrate 1	AW515443
214251_s_at	8.25823e-05	1.50208	NUMA1	nuclear mitotic apparatus protein 1	AI337584
202153_s_at	0.00256585	-1.54744	NUP62	nucleoporin 62kDa	NM_016553
218039_at	0.0127408	-1.5258	NUSAP1	nucleolar and spindle associated protein 1	NM_016359
209629_s_at	3.30052e-06	1.56951	NXT2	nuclear transport factor 2-like export factor 2	AK023289
201365_at	0.00766068	-1.61258	OAZ2	ornithine decarboxylase antizyme 2	NM_002537
207564_x_at	0.000438267	1.60288	OGT	O-linked N-acetylglucosamine (GlcNAc) transferase	NM_003605
207563_s_at	4.78057e-05	1.53451	OGT	O-linked N-acetylglucosamine (GlcNAc) transferase	U77413
213131_at	0.00813289	-2.64936	OLFM1	olfactomedin 1	R38389
213125_at	6.65171e-06	-1.6634	OLFML2B	olfactomedin-like 2B	AW007573
206323_x_at	4.19252e-07	1.69129	OPHN1	oligophrenin 1	NM_002547
209485_s_at	0.00105014	-2.13345	OSBPL1A	oxysterol binding protein-like 1A	AF274714
208158_s_at	0.0112545	-1.70968	OSBPL1A	oxysterol binding protein-like 1A	NM_018030
214161_at	0.00372033	1.5058	OSGIN2	oxidative stress induced growth inhibitor family member 2	BF057458
216650_at	0.00336305	1.59388	OTTHUMG00000016195///RP1-130G2.1	NULL///NULL	AL008627
216177_at	0.00852382	1.62261	OTTHUMG00000034589///RP11-375F2.3	NULL///NULL	AW582267
217544_at	1.65314e-06	-2.52194	OTTHUMG00000041115///RP11-488L18.4	NULL///NULL	AA768909
220608_s_at	0.0032151	1.6451	OTTHUMG00000172290///RP11-463I20.1	NULL///NULL	NM_014106
202091_at	0.00199881	1.99953	OTTHUMG00000175518///RP11-407G23.3	NULL///NULL	NM_012106
213158_at	0.000373686	2.0585	OTTHUMG00000175755///RP11-553L6.5	NULL///NULL	BG251521
209154_at	0.00132139	-1.69443	P2RX5-TAX1BP3///TAX1BP3	P2RX5-TAX1BP3 readthrough///Tax1 (human T-cell leukemia virus type I) binding protein 3	AF234997
215464_s_at	0.000881155	-1.55611	P2RX5-TAX1BP3///TAX1BP3	P2RX5-TAX1BP3 readthrough///Tax1 (human T-cell leukemia virus type I) binding protein 3	AK001327
214615_at	0.0060932	1.66131	P2RY10	purinergic receptor P2Y, G-protein coupled, 10	NM_014499
206277_at	0.00365428	-2.12824	P2RY2	purinergic receptor P2Y, G-protein coupled, 2	NM_002564
218886_at	0.00848134	-1.644	PAK1IP1	PAK1 interacting protein 1	NM_017906
200907_s_at	0.000636929	-3.14035	PALLD	palladin, cytoskeletal associated protein	AU157932
200897_s_at	0.00123844	-2.82515	PALLD	palladin, cytoskeletal associated protein	NM_016081
200906_s_at	0.00283901	-2.4247	PALLD	palladin, cytoskeletal associated protein	NM_016081
218809_at	0.00043394	-1.51249	PANK2	pantothenate kinase 2	NM_024960
204715_at	0.0020032	-1.62096	PANX1	pannexin 1	NM_015368
50400_at	0.0101712	-1.51628	PAOX	polyamine oxidase (exo-N4-amino)	AI743990
203060_s_at	0.0133483	-3.23002	PAPSS2	3'-phosphoadenosine 5'-phosphosulfate synthase 2	NM_004670
203058_s_at	0.00216197	-3.11496	PAPSS2	3'-phosphoadenosine 5'-phosphosulfate synthase 2	AW299958
206042_x_at	0.00177948	1.63303	PAR-SN///SNORD107///SNRPN///SNURF	paternally expressed transcript PAR-SN///small nucleolar RNA, C/D box 107///small nuclear ribonucleoprotein polypeptide N///SNRPN upstream reading frame	NM_005678
211391_s_at	2.01976e-06	2.1435	PATZ1	POZ (BTB) and AT hook containing zinc finger 1	AF254087
211392_s_at	6.48122e-06	1.83489	PATZ1	POZ (BTB) and AT hook containing zinc finger 1	AF242522
210581_x_at	0.000133597	1.63252	PATZ1	POZ (BTB) and AT hook containing zinc finger 1	AF254088
219543_at	7.29509e-06	-2.34025	PBLD	phenazine biosynthesis-like protein domain containing	NM_022129
211097_s_at	0.000261313	2.01894	PBX2	pre-B-cell leukemia homeobox 2	BC003111
207838_x_at	1.26161e-05	1.96391	PBXIP1	pre-B-cell leukemia homeobox interacting protein 1	NM_020524
212259_s_at	0.000432186	1.87586	PBXIP1	pre-B-cell leukemia homeobox interacting protein 1	BF344265
203860_at	0.00595761	-1.61713	PCCA	propionyl CoA carboxylase, alpha polypeptide	NM_000282
202847_at	0.000750769	-1.80159	PCK2	phosphoenolpyruvate carboxykinase 2 (mitochondrial)	NM_004563
209997_x_at	4.7481e-07	2.01715	PCM1	pericentriolar material 1	BC000453
209996_x_at	2.36975e-06	1.84988	PCM1	pericentriolar material 1	AA931266
218676_s_at	0.00650782	-1.96247	PCTP	phosphatidylcholine transfer protein	NM_021213
203803_at	0.000299458	-1.94341	PCYOX1	prenylcysteine oxidase 1	N45309
222380_s_at	0.00357234	1.58397	PDCD6	programmed cell death 6	AI907083
208591_s_at	4.50412e-06	2.40585	PDE3B	phosphodiesterase 3B, cGMP-inhibited	NM_000922
204735_at	0.00145675	-1.73301	PDE4A	phosphodiesterase 4A, cAMP-specific	NM_006202
205463_s_at	0.00104634	-1.53552	PDGFA	platelet-derived growth factor alpha polypeptide	NM_002607
206686_at	4.48122e-05	1.90317	PDK1	pyruvate dehydrogenase kinase, isozyme 1	NM_002610
221244_s_at	0.00336685	1.5844	PDPK1	3-phosphoinositide dependent protein kinase-1	NM_031268
202671_s_at	0.00250118	-1.85021	PDXK	pyridoxal (pyridoxine, vitamin B6) kinase	NM_003681
218018_at	0.000250744	-1.6319	PDXK	pyridoxal (pyridoxine, vitamin B6) kinase	AW449022
200788_s_at	0.00640211	-1.9482	PEA15	phosphoprotein enriched in astrocytes 15	NM_003768
208982_at	0.00812887	-1.73238	PECAM1	platelet/endothelial cell adhesion molecule 1	M37780
200634_at	2.05598e-05	2.28267	PFN1	profilin 1	NM_005022
204992_s_at	0.00933653	1.50968	PFN2	profilin 2	NM_002628
217383_at	5.86113e-05	3.21681	PGK1	phosphoglycerate kinase 1	S81916
201121_s_at	0.00186715	-1.73325	PGRMC1	progesterone receptor membrane component 1	NM_006667
204047_s_at	8.28774e-05	1.71453	PHACTR2	phosphatase and actin regulator 2	NM_014721
219235_s_at	2.08148e-06	-2.21923	PHACTR4	phosphatase and actin regulator 4	NM_023923
202928_s_at	0.00148443	1.94449	PHF1	PHD finger protein 1	NM_024165
209423_s_at	2.21126e-05	1.62104	PHF20	PHD finger protein 20	AY027523
217097_s_at	3.90058e-05	1.90536	PHTF2	putative homeodomain transcription factor 2	AC004990
203335_at	0.000204236	-1.59798	PHYH	phytanoyl-CoA 2-hydroxylase	NM_006214
51146_at	0.00609537	-1.59567	PIGV	phosphatidylinositol glycan anchor biosynthesis, class V	AA203365
211230_s_at	4.16835e-07	1.88164	PIK3CD	phosphatidylinositol-4,5-bisphosphate 3-kinase, catalytic subunit delta	U57843
221757_at	0.00010181	2.62875	PIK3IP1	phosphoinositide-3-kinase interacting protein 1	BE042976
212249_at	0.00161969	2.76319	PIK3R1	phosphoinositide-3-kinase, regulatory subunit 1 (alpha)	NM_181523
220566_at	0.000107923	1.62677	PIK3R5	phosphoinositide-3-kinase, regulatory subunit 5	NM_014308
220954_s_at	0.00140953	1.64928	PILRB	paired immunoglobin-like type 2 receptor beta	NM_013440
204269_at	0.000256521	2.00166	PIM2	pim-2 oncogene	NM_006875
211205_x_at	0.0002658	1.62758	PIP5K1A	phosphatidylinositol-4-phosphate 5-kinase, type I, alpha	U78577
204612_at	0.00601018	1.741	PKIA	protein kinase (cAMP-dependent, catalytic) inhibitor alpha	NM_006823
207717_s_at	0.000497302	-1.62395	PKP2	plakophilin 2	NM_004572
204458_at	0.000163875	-1.51849	PLA2G15	phospholipase A2, group XV	AL110209
209785_s_at	0.00562081	-2.66917	PLA2G4C	phospholipase A2, group IVC (cytosolic, calcium-independent)	AF065214
202925_s_at	0.00267535	-1.6155	PLAGL2	pleiomorphic adenoma gene-like 2	NM_002657
213222_at	0.0017646	-1.54176	PLCB1	phospholipase C, beta 1 (phosphoinositide-specific)	AL049593
216551_x_at	0.000576498	1.52706	PLCG1	phospholipase C, gamma 1	NM_002660
205934_at	0.00773669	1.91056	PLCL1	phospholipase C-like 1	NM_006226
217677_at	0.000394959	1.68278	PLEKHA2	pleckstrin homology domain containing, family A (phosphoinositide binding specific) member 2	BF542055
209504_s_at	0.00680299	1.82138	PLEKHB1	pleckstrin homology domain containing, family B (evectins) member 1	AF081583
201411_s_at	0.00466154	-1.53839	PLEKHB2	pleckstrin homology domain containing, family B (evectins) member 2	NM_017958
202122_s_at	0.000192208	-1.76196	PLIN3	perilipin 3	NM_005817
200827_at	0.00772848	-1.51544	PLOD1	procollagen-lysine, 2-oxoglutarate 5-dioxygenase 1	NM_000302
202430_s_at	0.00152377	-2.31928	PLSCR1	phospholipid scramblase 1	NM_021105
202446_s_at	0.00218703	-2.10724	PLSCR1	phospholipid scramblase 1	AI825926
212235_at	0.00134531	-1.75949	PLXND1	plexin D1	AL575403
210139_s_at	0.00201977	-2.0416	PMP22	peripheral myelin protein 22	L03203
214526_x_at	5.56338e-05	1.51897	PMS2P1	postmeiotic segregation increased 2 pseudogene 1	NM_005394
216843_x_at	0.000152467	1.51237	PMS2P1	postmeiotic segregation increased 2 pseudogene 1	U38964
216111_x_at	2.47113e-05	1.52032	PMS2P3	postmeiotic segregation increased 2 pseudogene 3	U38979
216525_x_at	1.17395e-06	1.51677	PMS2P3	postmeiotic segregation increased 2 pseudogene 3	D38437
203515_s_at	3.10732e-05	-1.65678	PMVK	phosphomevalonate kinase	NM_006556
39854_r_at	1.89596e-05	1.59321	PNPLA2	patatin-like phospholipase domain containing 2	AF055000
212836_at	0.00661761	-1.53849	POLD3	polymerase (DNA-directed), delta 3, accessory subunit	D26018
215357_s_at	9.55773e-09	2.04639	POLDIP3	polymerase (DNA-directed), delta interacting protein 3	Z93241
222238_s_at	0.000135724	1.58157	POLM	polymerase (DNA directed), mu	AK023002
217420_s_at	0.00026165	1.58871	POLR2A	polymerase (RNA) II (DNA directed) polypeptide A, 220kDa	M21610
201876_at	0.00349083	-1.83347	PON2	paraoxonase 2	NM_000305
210830_s_at	0.00223298	-1.71711	PON2	paraoxonase 2	AF001602
209482_at	4.14587e-06	-1.51723	POP7	processing of precursor 7, ribonuclease P/MRP subunit (S. cerevisiae)	BC001430
204566_at	0.011309	-1.64287	PPM1D	protein phosphatase, Mg2+/Mn2+ dependent, 1D	NM_003620
212686_at	0.000452244	-2.01645	PPM1H	protein phosphatase, Mg2+/Mn2+ dependent, 1H	AB032983
201702_s_at	0.00228966	1.64305	PPP1R10	protein phosphatase 1, regulatory subunit 10	AI492873
213774_s_at	1.40499e-07	1.88803	PPP1R2	protein phosphatase 1, regulatory (inhibitor) subunit 2	AW614578
200695_at	3.03896e-05	2.07824	PPP2R1A	protein phosphatase 2, regulatory subunit A, alpha	NM_014225
213950_s_at	4.20996e-06	2.01044	PPP3CC	protein phosphatase 3, catalytic subunit, gamma isozyme	NM_001243975
32540_at	4.45571e-08	2.00323	PPP3CC	protein phosphatase 3, catalytic subunit, gamma isozyme	NM_001243975
208932_at	0.00211391	1.57914	PPP4C	protein phosphatase 4, catalytic subunit	BC001416
200975_at	0.00209461	-1.53365	PPT1	palmitoyl-protein thioesterase 1	NM_000310
203056_s_at	0.000803352	2.52643	PRDM2	PR domain containing 2, with ZNF domain	NM_015866
216433_s_at	8.30135e-05	1.54447	PRDM2	PR domain containing 2, with ZNF domain	U23736
201923_at	0.00895825	-1.5033	PRDX4	peroxiredoxin 4	NM_006406
201835_s_at	1.19392e-05	1.67523	PRKAB1	protein kinase, AMP-activated, beta 1 non-catalytic subunit	BC001007
202742_s_at	0.00222612	1.86286	PRKACB	protein kinase, cAMP-dependent, catalytic, beta	NM_002731
200604_s_at	7.71011e-05	2.12255	PRKAR1A	protein kinase, cAMP-dependent, regulatory, type I, alpha	M18468
203680_at	0.0138467	-4.6902	PRKAR2B	protein kinase, cAMP-dependent, regulatory, type II, beta	NM_002736
206099_at	0.00180873	1.66186	PRKCH	protein kinase C, eta	NM_006255
205445_at	6.41872e-05	1.59567	PRL	prolactin	NM_000948
216069_at	0.00328524	3.257	PRMT2	protein arginine methyltransferase 2	AL050065
215707_s_at	0.00114915	1.65343	PRNP	prion protein	AV725328
203650_at	0.0151307	-1.52437	PROCR	protein C receptor, endothelial	NM_006404
207808_s_at	0.00598865	-3.48584	PROS1	protein S (alpha)	NM_000313
209385_s_at	0.00208887	-1.66491	PROSC	proline synthetase co-transcribed homolog (bacterial)	AA176833
209384_at	0.00413638	-1.5147	PROSC	proline synthetase co-transcribed homolog (bacterial)	AA176833
221546_at	8.88587e-07	1.73022	PRPF18	pre-mRNA processing factor 18	BC000794
214941_s_at	3.8572e-07	1.53397	PRPF40A	PRP40 pre-mRNA processing factor 40 homolog A (S. cerevisiae)	AA675900
211090_s_at	2.40303e-06	1.57755	PRPF4B	PRP4 pre-mRNA processing factor 4 homolog B (yeast)	Z25435
208879_x_at	0.000553302	2.14224	PRPF6	pre-mRNA processing factor 6	BG469030
219168_s_at	0.00513618	1.50205	PRR5	proline rich 5 (renal)	NM_017701
214052_x_at	4.10108e-06	3.64209	PRRC2C	proline-rich coiled-coil 2C	AW238632
207291_at	0.00910578	-1.50961	PRRG4	proline rich Gla (G-carboxyglutamic acid) 4 (transmembrane)	NM_024081
200871_s_at	0.0119519	-1.81826	PSAP	prosaposin	NM_002778
215923_s_at	1.70418e-05	2.06474	PSD4	pleckstrin and Sec7 domain containing 4	AK023421
211373_s_at	0.000215596	-1.66234	PSEN2	presenilin 2 (Alzheimer disease 4)	U34349
205194_at	0.00467366	-1.69127	PSPH	phosphoserine phosphatase	NM_004577
201896_s_at	0.00981255	-1.82978	PSRC1	proline/serine-rich coiled-coil 1	BC001425
219938_s_at	0.000452269	-2.39555	PSTPIP2	proline-serine-threonine phosphatase interacting protein 2	NM_024430
207223_s_at	9.39579e-05	1.77757	PTBP3	polypyrimidine tract binding protein 3	NM_005156
217494_s_at	0.000288581	3.57078	PTENP1	phosphatase and tensin homolog pseudogene 1	AF023139
204896_s_at	6.54186e-07	2.34553	PTGER4	prostaglandin E receptor 4 (subtype EP4)	AI675173
215813_s_at	0.00867565	-2.53367	PTGS1	prostaglandin-endoperoxide synthase 1 (prostaglandin G/H synthase and cyclooxygenase)	S36219
205128_x_at	0.00863736	-2.26285	PTGS1	prostaglandin-endoperoxide synthase 1 (prostaglandin G/H synthase and cyclooxygenase)	NM_000962
212032_s_at	0.000520489	1.60738	PTOV1	prostate tumor overexpressed 1	AL046054
216915_s_at	0.00144812	2.26748	PTPN12	protein tyrosine phosphatase, non-receptor type 12	S69182
216884_at	0.000175297	1.55646	PTPN12	protein tyrosine phosphatase, non-receptor type 12	S69182
213799_s_at	1.03755e-05	1.76112	PTPRA	protein tyrosine phosphatase, receptor type, A	BF740139
204960_at	8.66878e-05	1.89649	PTPRCAP	protein tyrosine phosphatase, receptor type, C-associated protein	NM_005608
212662_at	5.16537e-05	-1.96693	PVR	poliovirus receptor	BE615277
211823_s_at	0.00065758	1.60119	PXN	paxillin	D86862
221666_s_at	0.0057532	-1.79645	PYCARD	PYD and CARD domain containing	BC004470
210455_at	8.03502e-07	2.33305	R3HCC1L	R3H domain and coiled-coil containing 1-like	AF050198
221764_at	0.00135373	2.55599	R3HDM4	R3H domain containing 4	AL574186
55705_at	0.00292224	1.70875	R3HDM4	R3H domain containing 4	W07773
203933_at	0.000293484	1.55385	RAB11FIP3	RAB11 family interacting protein 3 (class II)	NM_014700
213440_at	0.000536086	-1.55571	RAB1A	RAB1A, member RAS oncogene family	AL530264
219622_at	0.00636059	-1.98309	RAB20	RAB20, member RAS oncogene family	NM_017817
207017_at	0.00511005	-1.69343	RAB27B	RAB27B, member RAS oncogene family	NM_004163
221960_s_at	0.000362205	2.3351	RAB2A	RAB2A, member RAS oncogene family	AI189609
206530_at	0.00164943	2.0077	RAB30	RAB30, member RAS oncogene family	NM_014488
217762_s_at	0.0127783	-2.34029	RAB31	RAB31, member RAS oncogene family	AF183421
217764_s_at	0.0140936	-2.24058	RAB31	RAB31, member RAS oncogene family	AF183421
217763_s_at	0.00949398	-2.1495	RAB31	RAB31, member RAS oncogene family	AF183421
205461_at	6.73967e-06	2.06538	RAB35	RAB35, member RAS oncogene family	NM_006861
206272_at	0.00097499	-2.21117	RAB4A///SPHAR	RAB4A, member RAS oncogene family///S-phase response (cyclin related)	NM_006542
203581_at	0.00511106	-1.57478	RAB4A///SPHAR	RAB4A, member RAS oncogene family///S-phase response (cyclin related)	BC002438
201048_x_at	8.03345e-07	1.75145	RAB6A	RAB6A, member RAS oncogene family	NM_002869
221808_at	0.000280625	-1.50007	RAB9A	RAB9A, member RAS oncogene family	NM_004251
208640_at	7.73717e-05	-1.91757	RAC1	ras-related C3 botulinum toxin substrate 1 (rho family, small GTP binding protein Rac1)	NM_006908
207419_s_at	1.35733e-08	2.31253	RAC2	ras-related C3 botulinum toxin substrate 2 (rho family, small GTP binding protein Rac2)	NM_002872
200607_s_at	5.01184e-05	1.92568	RAD21	RAD21 homolog (S. pombe)	BG289967
201039_s_at	0.000149048	1.78188	RAD23A	RAD23 homolog A (S. cerevisiae)	NM_005053
37793_r_at	0.00709485	1.72093	RAD51D	RAD51 homolog D (S. cerevisiae)	AF034956
201711_x_at	0.00283561	1.9767	RANBP2	RAN binding protein 2	AI681120
221830_at	0.00207461	-2.23351	RAP2A	RAP2A, member of RAS oncogene family	AI302106
206221_at	8.8769e-05	1.84823	RASA3	RAS p21 protein activator 3	NM_007368
208534_s_at	0.0154598	1.56851	RASA4	RAS p21 protein activator 4///RAS p21 protein activator 4B///RAS p21 protein activator 4C, pseudogene	NM_006989
203344_s_at	0.000782156	-2.60191	RBBP8	retinoblastoma binding protein 8	NM_002894
221440_s_at	6.79294e-06	1.62636	RBBP9	retinoblastoma binding protein 9	NM_006606
212332_at	3.03017e-05	3.6837	RBL2	retinoblastoma-like 2 (p130)	BF110947
212028_at	0.00292696	1.64028	RBM25	RNA binding motif protein 25	BE466128
221594_at	4.79404e-05	1.89278	RBM48	RNA binding motif protein 48	AL136619
209936_at	1.27944e-05	2.09024	RBM5	RNA binding motif protein 5	AF107493
208370_s_at	9.73468e-05	-1.85508	RCAN1	regulator of calcineurin 1	NM_004414
219864_s_at	3.94365e-05	3.40751	RCAN3	RCAN family member 3	NM_013441
201063_at	0.000739213	-1.75539	RCN1	reticulocalbin 1, EF-hand calcium binding domain	NM_002901
212612_at	0.00213202	-1.55776	RCOR1	REST corepressor 1	D31888
212397_at	0.00763215	-1.5677	RDX	radixin	AL137751
216153_x_at	1.24144e-06	1.72563	RECK	reversion-inducing-cysteine-rich protein with kazal motifs	AK022897
206035_at	0.00222119	2.64506	REL	v-rel reticuloendotheliosis viral oncogene homolog (avian)	NM_002908
209878_s_at	0.000258068	1.53689	RELA	v-rel reticuloendotheliosis viral oncogene homolog A (avian)	M62399
221643_s_at	0.00664994	1.51612	RERE	arginine-glutamic acid dipeptide (RE) repeats	AF016005
211421_s_at	0.000642694	-1.54312	RET	ret proto-oncogene	M31213
203225_s_at	0.00169865	-1.75108	RFK	riboflavin kinase	NM_018339
203224_at	0.000637037	-1.6032	RFK	riboflavin kinase	BF340123
218430_s_at	0.0134073	1.56656	RFX7	regulatory factor X, 7	BF740077
218723_s_at	0.014771	1.56169	RGCC	regulator of cell cycle	NM_014059
214000_s_at	0.000436828	1.93385	RGS10	regulator of G-protein signaling 10	AI744627
213409_s_at	0.0117769	1.61285	RHEB	Ras homolog enriched in brain	BF593727
212651_at	0.00202142	-2.32124	RHOBTB1	Rho-related BTB domain containing 1	AB018283
204951_at	0.000398553	2.01187	RHOH	ras homolog family member H	NM_004310
212119_at	2.29111e-05	-2.86487	RHOQ	ras homolog family member Q	BF670447
214449_s_at	7.95738e-05	-2.04802	RHOQ	ras homolog family member Q	NM_012249
212122_at	0.00217458	-2.0306	RHOQ	ras homolog family member Q	AW771590
212117_at	0.00035979	-1.72928	RHOQ	ras homolog family member Q	BF978689
218323_at	0.00065417	-1.50544	RHOT1	ras homolog family member T1	NM_018307
205211_s_at	6.73327e-05	-1.53389	RIN1	Ras and Rab interactor 1	NM_004292
219456_s_at	6.57355e-05	1.64534	RIN3	Ras and Rab interactor 3	NM_024832
213397_x_at	0.00793279	-3.65777	RNASE4	ribonuclease, RNase A family, 4	AI761728
205158_at	0.00905037	-2.93693	RNASE4	ribonuclease, RNase A family, 4	NM_002937
205748_s_at	0.000143188	1.84803	RNF126	ring finger protein 126	NM_017876
210932_s_at	0.000254884	2.12547	RNF6	ring finger protein (C3H2C3 type) 6	AF293342
206050_s_at	0.0103652	-1.52809	RNH1	ribonuclease/angiogenin inhibitor 1	NM_002939
208270_s_at	0.00461179	-1.58109	RNPEP	arginyl aminopeptidase (aminopeptidase B)	NM_020216
210479_s_at	0.00019934	2.20366	RORA	RAR-related orphan receptor A	L14611
210426_x_at	0.000453736	2.05549	RORA	RAR-related orphan receptor A	U04897
216962_at	5.06906e-05	2.29383	RPAIN	RPA interacting protein	M69039
221989_at	0.00578625	2.49575	RPL10///SNORA70	ribosomal protein L10///small nucleolar RNA, H/ACA box 70	AW057781
219138_at	3.61141e-05	2.87058	RPL14	ribosomal protein L14	NM_003973
212044_s_at	1.49466e-05	3.22259	RPL27A	ribosomal protein L27a	BE737027
217347_at	0.0034835	1.50369	RPL35P8///RPL35P8	ribosomal protein L35 pseudogene 8///NULL	Z82202
214041_x_at	1.69246e-07	2.93655	RPL37A	ribosomal protein L37a	BE857772
202028_s_at	1.31552e-05	2.68016	RPL38	ribosomal protein L38	BC000603
221943_x_at	7.69993e-06	2.55589	RPL38	ribosomal protein L38	AW303136
200908_s_at	1.05261e-05	2.14954	RPLP2	ribosomal protein, large, P2	BC005354
212553_at	1.88443e-05	1.57101	RPRD2	regulation of nuclear pre-mRNA domain containing 2	AK026120
214001_x_at	1.12853e-05	2.65919	RPS10	ribosomal protein S10	AW302047
217336_at	0.0053047	1.51017	RPS10P2///RPS10P2	ribosomal protein S10 pseudogene 2///NULL	AL118510
213350_at	0.000244514	2.4923	RPS11	ribosomal protein S11	BF680255
214245_at	6.29214e-07	1.97418	RPS14	ribosomal protein S14	AI734124
216348_at	0.00232872	1.55158	RPS17P5///RPS17P5	ribosomal protein S17 pseudogene 5///NULL	AL049693
217466_x_at	0.0137052	1.50178	RPS2///SNORA64	ribosomal protein S2///small nucleolar RNA, H/ACA box 64	L48784
218909_at	0.00126241	-1.56214	RPS6KC1	ribosomal protein S6 kinase, 52kDa, polypeptide 1	NM_012424
212647_at	0.00254706	-2.05369	RRAS	related RAS viral (r-ras) oncogene homolog	NM_006270
201204_s_at	2.50041e-06	-1.91529	RRBP1	ribosome binding protein 1	AA706065
201476_s_at	1.39574e-07	1.91732	RRM1	ribonucleotide reductase M1	AI692974
212019_at	0.0023212	-1.56266	RSL1D1	ribosomal L1 domain containing 1	AK025446
211509_s_at	5.24108e-05	-1.52571	RTN4	reticulon 4	AB015639
210251_s_at	0.0131187	-1.58634	RUFY3	RUN and FYVE domain containing 3	AF112221
202449_s_at	0.011013	-1.91373	RXRA	retinoid X receptor, alpha	NM_002957
202426_s_at	0.0108007	-1.77099	RXRA	retinoid X receptor, alpha	BE675800
215099_s_at	4.33361e-08	2.6496	RXRB	retinoid X receptor, beta	BF337038
214370_at	1.07451e-05	3.65296	S100A8	S100 calcium binding protein A8	AW238654
205449_at	0.0040042	-1.86203	SAC3D1	SAC3 domain containing 1	NM_013299
212845_at	0.00765582	-2.10789	SAMD4A	sterile alpha motif domain containing 4A	AB028976
204900_x_at	0.00651608	-2.03242	SAP30	Sin3A-associated protein, 30kDa	NM_003864
213236_at	0.00889271	-1.72425	SASH1	SAM and SH3 domain containing 1	AK025495
218276_s_at	0.000457142	-1.65821	SAV1	salvador homolog 1 (Drosophila)	AI679398
216161_at	9.12866e-05	-1.61628	SBNO1	strawberry notch homolog 1 (Drosophila)	AK024128
214997_at	0.00634965	-1.50296	SCAI	suppressor of cancer cell invasion	AW675473
206995_x_at	0.00718834	-1.80709	SCARF1	scavenger receptor class F, member 1	NM_003693
201826_s_at	0.000241131	-1.50075	SCCPDH	saccharopine dehydrogenase (putative)	NM_016002
200832_s_at	0.00443945	-1.64033	SCD	stearoyl-CoA desaturase (delta-9-desaturase)	AB032261
220232_at	0.00105849	2.0121	SCD5	stearoyl-CoA desaturase 5	NM_024906
218217_at	0.0136008	-1.99405	SCPEP1	serine carboxypeptidase 1	NM_021626
201462_at	0.00179894	-1.89999	SCRN1	secernin 1	NM_014766
217600_at	0.00356064	1.62109	SCUBE3	signal peptide, CUB domain, EGF-like 3	BF511678
221220_s_at	2.34721e-08	2.97311	SCYL2	SCY1-like 2 (S. cerevisiae)	NM_017988
201290_at	0.00687656	-1.51999	SEC11A	SEC11 homolog A (S. cerevisiae)	NM_014300
201582_at	0.000688437	-1.84036	SEC23B	Sec23 homolog B (S. cerevisiae)	AL121900
215209_at	0.00073506	-1.73696	SEC24D	SEC24 family, member D (S. cerevisiae)	AU143984
209880_s_at	1.44044e-06	1.65312	SELPLG	selectin P ligand	U02297
203789_s_at	0.00790058	-2.71943	SEMA3C	sema domain, immunoglobulin domain (Ig), short basic domain, secreted, (semaphorin) 3C	NM_006379
209722_s_at	5.23069e-07	2.12709	SERPINB9	serpin peptidase inhibitor, clade B (ovalbumin), member 9	BC002538
200986_at	0.00436575	-1.77917	SERPING1	serpin peptidase inhibitor, clade G (C1 inhibitor), member 1	NM_000062
220946_s_at	0.000847069	1.65068	SETD2	SET domain containing 2	NM_014159
210172_at	0.000500667	2.86544	SF1	splicing factor 1	D26121
214305_s_at	0.00152152	1.92196	SF3B1	splicing factor 3b, subunit 1, 155kDa	AW003030
201070_x_at	0.00260466	1.86627	SF3B1	splicing factor 3b, subunit 1, 155kDa	AI739389
202773_s_at	6.39094e-07	2.33078	SFSWAP	splicing factor, suppressor of white-apricot homolog (Drosophila)	NM_004592
211210_x_at	6.29437e-05	1.76159	SH2D1A	SH2 domain containing 1A	AF100539
211209_x_at	5.85714e-05	1.72681	SH2D1A	SH2 domain containing 1A	AF100540
211211_x_at	0.000193403	1.59508	SH2D1A	SH2 domain containing 1A	AF100542
211250_s_at	0.000146674	-1.66772	SH3BP2	SH3-domain binding protein 2	AB000463
222258_s_at	0.0112407	-1.99922	SH3BP4	SH3-domain binding protein 4	AF015043
218813_s_at	2.6388e-05	1.98827	SH3GLB2	SH3-domain GRB2-like endophilin B2	NM_020145
219256_s_at	0.000743575	-2.13441	SH3TC1	SH3 domain and tetratricopeptide repeats 1	NM_018986
219493_at	0.00307982	-1.85558	SHCBP1	SHC SH2-domain binding protein 1	NM_024745
56256_at	0.00171689	-2.41517	SIDT2	SID1 transmembrane family, member 2	AA150165
218765_at	0.00221033	-1.81206	SIDT2	SID1 transmembrane family, member 2	NM_015996
210796_x_at	0.000117132	1.58485	SIGLEC6	sialic acid binding Ig-like lectin 6	D86359
207224_s_at	0.00315903	-2.20732	SIGLEC7	sialic acid binding Ig-like lectin 7	NM_016543
214484_s_at	5.07393e-05	1.71372	SIGMAR1	sigma non-opioid intracellular receptor 1	AF226604
221705_s_at	0.000175595	2.88967	SIKE1	suppressor of IKBKE 1	BC005934
220485_s_at	0.0017515	2.0332	SIRPG	signal-regulatory protein gamma	NM_018556
219613_s_at	4.82091e-05	1.51419	SIRT6	sirtuin 6	NM_016539
204362_at	0.00176026	-1.86195	SKAP2	src kinase associated phosphoprotein 2	AB014486
206181_at	0.00269146	1.64698	SLAMF1	signaling lymphocytic activation molecule family member 1	NM_003037
219386_s_at	0.000165681	-2.26718	SLAMF8	SLAM family member 8	NM_020125
219593_at	0.00827727	-1.5983	SLC15A3	solute carrier family 15, member 3	NM_016582
206600_s_at	0.00464028	-1.72104	SLC16A5	solute carrier family 16, member 5 (monocarboxylic acid transporter 6)	NM_004695
210807_s_at	0.000560816	1.55927	SLC16A7	solute carrier family 16, member 7 (monocarboxylic acid transporter 2)	AF049608
211576_s_at	0.00324907	-1.50063	SLC19A1	solute carrier family 19 (folate transporter), member 1	BC003068
211842_s_at	0.000724326	1.58815	SLC24A1	solute carrier family 24 (sodium/potassium/calcium exchanger), member 1	AF026132
57588_at	0.0159712	-1.8451	SLC24A3	solute carrier family 24 (sodium/potassium/calcium exchanger), member 3	R62432
203775_at	0.0006095	-1.51827	SLC25A13	solute carrier family 25 (aspartate/glutamate carrier), member 13	NM_014251
210686_x_at	0.000449108	1.56219	SLC25A16	solute carrier family 25 (mitochondrial carrier; Graves disease autoantigen), member 16	BC001407
204342_at	0.0103323	-1.57263	SLC25A24	solute carrier family 25 (mitochondrial carrier; phosphate carrier), member 24	NM_013386
222217_s_at	0.00521808	-1.68065	SLC27A3	solute carrier family 27 (fatty acid transporter), member 3	BC003654
204429_s_at	0.00509984	1.51189	SLC2A5	solute carrier family 2 (facilitated glucose/fructose transporter), member 5	BE560461
220091_at	0.00257158	2.20026	SLC2A6	solute carrier family 2 (facilitated glucose transporter), member 6	NM_017585
212907_at	0.00119405	1.94361	SLC30A1	solute carrier family 30 (zinc transporter), member 1	AI972416
203971_at	0.00213493	-2.8647	SLC31A1	solute carrier family 31 (copper transporters), member 1	NM_001859
209865_at	4.90076e-05	-1.97845	SLC35A3	solute carrier family 35 (UDP-N-acetylglucosamine (UDP-GlcNAc) transporter), member A3	BC005136
218519_at	0.0112113	-1.6801	SLC35A5	solute carrier family 35, member A5	NM_017945
213082_s_at	3.9848e-07	-1.67301	SLC35D2	solute carrier family 35, member D2	AJ005866
218237_s_at	0.00319953	1.51257	SLC38A1	solute carrier family 38, member 1	NM_030674
216504_s_at	1.34818e-05	1.70345	SLC39A8	solute carrier family 39 (zinc transporter), member 8	AL049963
210739_x_at	0.000667761	1.5171	SLC4A4	solute carrier family 4, sodium bicarbonate cotransporter, member 4	AF069510
211494_s_at	0.00193491	1.5074	SLC4A4	solute carrier family 4, sodium bicarbonate cotransporter, member 4	AF157492
210286_s_at	0.000248168	2.00634	SLC4A7	solute carrier family 4, sodium bicarbonate cotransporter, member 7	AF053755
209884_s_at	0.00209651	1.53563	SLC4A7	solute carrier family 4, sodium bicarbonate cotransporter, member 7	AF047033
203578_s_at	0.000634861	1.7305	SLC7A6	solute carrier family 7 (amino acid transporter light chain, y+L system), member 6	NM_003983
203579_s_at	0.00615476	1.68281	SLC7A6	solute carrier family 7 (amino acid transporter light chain, y+L system), member 6	AI660619
219229_at	0.00465845	-1.64969	SLCO3A1	solute carrier organic anion transporter family, member 3A1	NM_013272
219885_at	0.0138044	-1.604	SLFN12	schlafen family member 12	NM_018042
210993_s_at	0.00292075	-2.39879	SMAD1	SMAD family member 1	U54826
205396_at	6.74035e-05	1.85674	SMAD3	SMAD family member 3	BF971416
205397_x_at	0.00117083	1.53438	SMAD3	SMAD family member 3	U76622
212257_s_at	0.000332129	1.77033	SMARCA2	SWI/SNF related, matrix associated, actin dependent regulator of chromatin, subfamily a, member 2	AW131754
219806_s_at	0.0055581	-3.04772	SMCO4	single-pass membrane protein with coiled-coil domains 4	NM_020179
201793_x_at	4.43926e-05	1.7908	SMG7	smg-7 homolog, nonsense mediated mRNA decay factor (C. elegans)	NM_014837
217189_s_at	0.000201611	1.53931	SMG7	smg-7 homolog, nonsense mediated mRNA decay factor (C. elegans)	AL137800
216230_x_at	2.19296e-05	1.80887	SMPD1	sphingomyelin phosphodiesterase 1, acid lysosomal	M59917
218032_at	7.26826e-05	-1.74064	SNN	stannin	AF070673
213121_at	0.000335405	1.64485	SNRNP70	small nuclear ribonucleoprotein 70kDa (U1)	W67744
215450_at	3.73085e-05	2.7024	SNRPE	small nuclear ribonucleoprotein polypeptide E	W87901
215820_x_at	0.000212398	1.62244	SNX13	sorting nexin 13	AK001861
218705_s_at	0.00244655	-1.71095	SNX24	sorting nexin 24	NM_014035
214712_at	5.32343e-06	2.24256	SNX29P2	sorting nexin 29 pseudogene 2	AK023827
209999_x_at	0.00479585	1.9515	SOCS1	suppressor of cytokine signaling 1	AB005043
206360_s_at	0.00048896	1.83108	SOCS3	suppressor of cytokine signaling 3	NM_003955
206020_at	0.0061639	-1.62409	SOCS6	suppressor of cytokine signaling 6	NM_016387
217576_x_at	0.00155368	1.90291	SOS2	son of sevenless homolog 2 (Drosophila)	NM_006939
219496_at	0.000443864	-1.88262	SOWAHC	sosondowah ankyrin repeat domain family member C	NM_023016
201417_at	0.00369806	-1.74937	SOX4	SRY (sex determining region Y)-box 4	AL136179
201418_s_at	4.77389e-05	-1.54564	SOX4	SRY (sex determining region Y)-box 4	NM_003107
210218_s_at	0.0097303	1.69467	SP100	SP100 nuclear antigen	U36501
209761_s_at	1.89323e-07	2.08376	SP110	SP110 nuclear body protein	AA969194
205406_s_at	0.00403212	-1.55304	SPA17	sperm autoantigenic protein 17	NM_017425
206748_s_at	0.00336679	1.53904	SPAG9	sperm associated antigen 9	NM_003971
200665_s_at	0.00766181	-4.27129	SPARC	secreted protein, acidic, cysteine-rich (osteonectin)	NM_003118
212667_at	0.00562932	-2.07994	SPARC	secreted protein, acidic, cysteine-rich (osteonectin)	AL575922
220298_s_at	0.0015851	-1.88901	SPATA6	spermatogenesis associated 6	NM_019073
220299_at	0.000337297	-1.79	SPATA6	spermatogenesis associated 6	NM_019073
219583_s_at	0.000287938	-1.84372	SPATA7	spermatogenesis associated 7	NM_018418
201996_s_at	0.00165301	2.15681	SPEN	spen homolog, transcriptional regulator (Drosophila)	AL524033
206057_x_at	1.07953e-06	1.58323	SPN	sialophorin	NM_003123
202524_s_at	0.000305172	1.80726	SPOCK2	sparc/osteonectin, cwcv and kazal-like domains proteoglycan (testican) 2	AI952009
202523_s_at	0.00153657	1.6126	SPOCK2	sparc/osteonectin, cwcv and kazal-like domains proteoglycan (testican) 2	AI952009
214925_s_at	0.00898047	1.53343	SPTAN1	spectrin, alpha, non-erythrocytic 1	AK026484
200671_s_at	1.02416e-06	3.03635	SPTBN1	spectrin, beta, non-erythrocytic 1	N92501
200672_x_at	4.22512e-05	1.86455	SPTBN1	spectrin, beta, non-erythrocytic 1	NM_003128
212071_s_at	0.00240035	1.52471	SPTBN1	spectrin, beta, non-erythrocytic 1	BE968833
203128_at	0.000640756	-2.4386	SPTLC2	serine palmitoyltransferase, long chain base subunit 2	NM_004863
203127_s_at	0.0102996	-1.50618	SPTLC2	serine palmitoyltransferase, long chain base subunit 2	BC005123
213508_at	0.00233739	-1.83873	SPTSSA	serine palmitoyltransferase, small subunit A	AA142942
217995_at	0.000251606	-1.56856	SQRDL	sulfide quinone reductase-like (yeast)	NM_021199
204675_at	0.000427779	-2.53244	SRD5A1	steroid-5-alpha-reductase, alpha polypeptide 1 (3-oxo-5 alpha-steroid delta 4-dehydrogenase alpha 1)	NM_001047
210959_s_at	0.0141076	-2.05254	SRD5A1	steroid-5-alpha-reductase, alpha polypeptide 1 (3-oxo-5 alpha-steroid delta 4-dehydrogenase alpha 1)	AF113128
211056_s_at	0.00209997	-1.56105	SRD5A1	steroid-5-alpha-reductase, alpha polypeptide 1 (3-oxo-5 alpha-steroid delta 4-dehydrogenase alpha 1)	BC006373
213329_at	0.000428412	-1.68983	SRGAP2///SRGAP2D	SLIT-ROBO Rho GTPase activating protein 2///SLIT-ROBO Rho GTPase activating protein 2D	AA742261
202199_s_at	0.0003699	1.64457	SRPK1	SRSF protein kinase 1	AW082913
214931_s_at	1.47187e-05	1.59129	SRPK2	SRSF protein kinase 2	AC005070
200917_s_at	9.42138e-07	3.05283	SRPR	signal recognition particle receptor (docking protein)	NM_003139
201224_s_at	4.41707e-07	1.60624	SRRM1	serine/arginine repetitive matrix 1	NM_005839
208610_s_at	0.000124079	1.84673	SRRM2	serine/arginine repetitive matrix 2	AI655799
216629_at	0.000153454	1.83741	SRRM2	serine/arginine repetitive matrix 2	AC004493
201679_at	9.7096e-06	1.58882	SRRT	serrate RNA effector molecule homolog (Arabidopsis)	BE646076
201742_x_at	1.92981e-06	2.28651	SRSF1	serine/arginine-rich splicing factor 1	M69040
213742_at	0.000130475	2.07831	SRSF11	serine/arginine-rich splicing factor 11	AW241752
210077_s_at	0.000230275	3.09999	SRSF5	serine/arginine-rich splicing factor 5	U30884
213152_s_at	0.00253021	1.52926	SRSF8	serine/arginine-rich splicing factor 8	AI343248
202506_at	0.000161229	-1.52103	SSFA2	sperm specific antigen 2	NM_006751
217790_s_at	1.94167e-05	-2.09932	SSR3	signal sequence receptor, gamma (translocon-associated protein gamma)	NM_007107
216905_s_at	0.00139269	-1.91787	ST14	suppression of tumorigenicity 14 (colon carcinoma)	U20428
214971_s_at	3.73251e-07	4.20692	ST6GAL1	ST6 beta-galactosamide alpha-2,6-sialyltranferase 1	AV695711
207871_s_at	0.0006106	-1.7376	ST7///ST7-OT3	suppression of tumorigenicity 7///ST7 overlapping transcript 3 (non-protein coding)	NM_018412
AFFX-HUMISGF3A/M97935_5_at	1.70604e-06	2.73383	STAT1	signal transducer and activator of transcription 1, 91kDa	NM_007315
AFFX-HUMISGF3A/M97935_MA_at	0.000714208	1.65517	STAT1	signal transducer and activator of transcription 1, 91kDa	NM_007315
217199_s_at	9.24258e-05	1.58715	STAT2	signal transducer and activator of transcription 2, 113kDa	S81491
205026_at	0.000366198	1.59939	STAT5B	signal transducer and activator of transcription 5B	NM_012448
212550_at	0.00127058	1.51382	STAT5B	signal transducer and activator of transcription 5B	AI149535
201332_s_at	0.0129123	1.54	STAT6	signal transducer and activator of transcription 6, interleukin-4 induced	AH006951
218424_s_at	0.00504095	-1.5309	STEAP3	STEAP family member 3, metalloreductase	NM_018234
212009_s_at	4.15947e-05	1.88943	STIP1	stress-induced-phosphoprotein 1	AL553320
215188_at	0.00537408	1.59956	STK24	serine/threonine kinase 24	AF339785
204068_at	0.00413324	-1.96903	STK3	serine/threonine kinase 3	NM_006281
211085_s_at	0.000249219	2.50827	STK4	serine/threonine kinase 4	Z25430
205411_at	0.001314	1.53314	STK4	serine/threonine kinase 4	NM_006282
218207_s_at	0.00254124	1.53291	STMN3	stathmin-like 3	NM_015894
203767_s_at	0.00635123	-1.79711	STS	steroid sulfatase (microsomal), isozyme S	AI122754
212111_at	0.0022998	-1.69265	STX12	syntaxin 12	AA628051
212112_s_at	0.00208603	-1.51457	STX12	syntaxin 12	AI816243
221638_s_at	2.23192e-07	3.39022	STX16	syntaxin 16	AF008937
216985_s_at	0.00450589	2.02193	STX3	syntaxin 3	AJ002077
215774_s_at	1.3039e-06	2.31717	SUCLG2	succinate-CoA ligase, GDP-forming, beta subunit	AV650470
215299_x_at	0.00754992	-1.70911	SULT1A1	sulfotransferase family, cytosolic, 1A, phenol-preferring, member 1	U37025
203615_x_at	0.00400447	-1.61914	SULT1A1	sulfotransferase family, cytosolic, 1A, phenol-preferring, member 1	NM_001055
211385_x_at	0.00546404	-1.64969	SULT1A2	sulfotransferase family, cytosolic, 1A, phenol-preferring, member 2	U28169
207122_x_at	0.00615839	-1.57039	SULT1A2	sulfotransferase family, cytosolic, 1A, phenol-preferring, member 2	NM_001054
206487_at	0.00480871	-1.77443	SUN1	Sad1 and UNC84 domain containing 1	NM_025154
213971_s_at	0.00408294	1.58875	SUZ12///SUZ12P1	SUZ12 polycomb repressive complex 2 subunit///suppressor of zeste 12 homolog pseudogene 1	AI924660
207540_s_at	0.00816309	-1.92458	SYK	spleen tyrosine kinase	NM_003177
210613_s_at	6.94531e-05	-2.10312	SYNGR1	synaptogyrin 1	BC000731
209198_s_at	0.00228041	-1.74755	SYT11	synaptotagmin XI	BC004291
217433_at	2.67375e-06	1.59207	TACC1	transforming, acidic coiled-coil containing protein 1	AB029026
221618_s_at	1.44462e-07	2.95183	TAF9B	TAF9B RNA polymerase II, TATA box binding protein (TBP)-associated factor, 31kDa	AF077053
210978_s_at	0.000947994	1.5622	TAGLN2	transgelin 2	BC002616
206283_s_at	0.0118188	-2.62173	TAL1	T-cell acute lymphocytic leukemia 1	NM_003189
208425_s_at	0.00509672	1.59798	TANC2	tetratricopeptide repeat, ankyrin repeat and coiled-coil containing 2	NM_015623
204770_at	9.80732e-05	1.85633	TAP2	transporter 2, ATP-binding cassette, sub-family B (MDR/TAP)	NM_000544
216373_at	0.00597454	-1.50277	TAPT1	transmembrane anterior posterior transformation 1	AF189251
221858_at	0.00709366	-2.42812	TBC1D12	TBC1 domain family, member 12	N34407
222173_s_at	0.00460218	-1.64338	TBC1D2	TBC1 domain family, member 2	AK026105
203387_s_at	0.00791944	1.82059	TBC1D4	TBC1 domain family, member 4	NM_014832
203386_at	0.0109454	1.74401	TBC1D4	TBC1 domain family, member 4	AI650848
204526_s_at	0.00497516	-3.11071	TBC1D8	TBC1 domain family, member 8 (with GRAM domain)	NM_007063
218520_at	0.0022597	-1.57141	TBK1	TANK-binding kinase 1	NM_013254
213604_at	9.7891e-06	-1.61322	TCEB3	transcription elongation factor B (SIII), polypeptide 3 (110kDa, elongin A)	AW451236
202648_at	2.698e-06	2.33019	TCF3	transcription factor 3	BC000023
209151_x_at	0.00169222	1.5164	TCF3	transcription factor 3	M31523
205254_x_at	0.000168146	2.91115	TCF7	transcription factor 7 (T-cell specific, HMG-box)	AW027359
216511_s_at	0.000345737	-3.27393	TCF7L2	transcription factor 7-like 2 (T-cell specific, HMG-box)	AJ270770
216035_x_at	0.00081744	-2.79451	TCF7L2	transcription factor 7-like 2 (T-cell specific, HMG-box)	AV721430
212761_at	0.00304139	-2.37542	TCF7L2	transcription factor 7-like 2 (T-cell specific, HMG-box)	AI703074
216037_x_at	0.00096161	-2.36856	TCF7L2	transcription factor 7-like 2 (T-cell specific, HMG-box)	AA664011
208336_s_at	0.000217629	1.57875	TECR	trans-2,3-enoyl-CoA reductase	NM_004868
205727_at	5.93233e-05	-1.91479	TEP1	telomerase-associated protein 1	NM_007110
218872_at	0.00881617	-1.57651	TESC	tescalcin	NM_017899
219724_s_at	0.00746623	1.89241	TESPA1	thymocyte expressed, positive selection associated 1	NM_014796
50221_at	0.000111616	-1.73546	TFEB	transcription factor EB	AI524138
221871_s_at	1.32914e-06	1.56336	TFG	TRK-fused gene	BF057492
207334_s_at	2.53764e-07	2.60567	TGFBR2	transforming growth factor, beta receptor II (70/80kDa)	NM_003242
218724_s_at	0.00507183	1.61188	TGIF2	TGFB-induced factor homeobox 2	AL050318
212040_at	5.00157e-06	-1.54514	TGOLN2	trans-golgi network protein 2	BG249599
217847_s_at	2.4097e-06	1.63271	THRAP3	thyroid hormone receptor associated protein 3	NM_005119
202085_at	0.00948807	-2.13645	TJP2	tight junction protein 2	NM_004817
204276_at	0.00475312	-1.88057	TK2	thymidine kinase 2, mitochondrial	BE895437
204277_s_at	4.41429e-05	-1.76916	TK2	thymidine kinase 2, mitochondrial	BE895437
208700_s_at	0.00277332	-1.99687	TKT	transketolase	L12711
203222_s_at	0.0145309	-1.65301	TLE1	transducin-like enhancer of split 1 (E(sp1) homolog, Drosophila)	NM_005077
216997_x_at	0.000763134	2.267	TLE4	transducin-like enhancer of split 4 (E(sp1) homolog, Drosophila)	AL358975
211077_s_at	0.000218628	1.8376	TLK1	tousled-like kinase 1	Z25421
212963_at	0.00161598	1.71206	TM2D1	TM2 domain containing 1	BF968960
217974_at	0.00560611	-1.64333	TM7SF3	transmembrane 7 superfamily member 3	NM_016551
200803_s_at	1.3409e-06	1.50772	TMBIM6	transmembrane BAX inhibitor motif containing 6	NM_003217
214958_s_at	4.61328e-05	1.71452	TMC6	transmembrane channel-like 6	AK021738
220097_s_at	0.000154986	-1.57242	TMEM104	transmembrane protein 104	NM_017728
201003_x_at	0.0094726	-1.51567	TMEM189///TMEM189-UBE2V1///UBE2V1	transmembrane protein 189///TMEM189-UBE2V1 readthrough///ubiquitin-conjugating enzyme E2 variant 1	NM_003349
221512_at	0.000136539	1.50499	TMEM222	transmembrane protein 222	AL136683
212574_x_at	3.76283e-06	3.47851	TMEM259	transmembrane protein 259	AC004528
213986_s_at	3.84577e-08	3.39478	TMEM259	transmembrane protein 259	AI805266
212575_at	1.8848e-06	2.84522	TMEM259	transmembrane protein 259	BF966155
219410_at	0.00239545	-1.5841	TMEM45A	transmembrane protein 45A	NM_018004
204807_at	0.012479	-1.53521	TMEM5	transmembrane protein 5	BF224146
214833_at	0.000653144	1.60549	TMEM63A	transmembrane protein 63A	AB007958
202699_s_at	0.000541864	1.53306	TMEM63A	transmembrane protein 63A	AW510783
220800_s_at	3.84473e-05	1.83755	TMOD3	tropomodulin 3 (ubiquitous)	NM_014547
209754_s_at	8.96463e-05	2.46771	TMPO	thymopoietin	AF113682
209753_s_at	0.000442902	2.01491	TMPO	thymopoietin	AF113682
210405_x_at	0.00266549	1.50412	TNFRSF10B	tumor necrosis factor receptor superfamily, member 10b	NM_003842
203508_at	0.00514702	-2.06329	TNFRSF1B	tumor necrosis factor receptor superfamily, member 1B	NM_001066
214581_x_at	0.00793081	-1.81065	TNFRSF21	tumor necrosis factor receptor superfamily, member 21	NM_014452
218856_at	0.00766816	-1.67591	TNFRSF21	tumor necrosis factor receptor superfamily, member 21	NM_014452
216042_at	1.78638e-05	2.39811	TNFRSF25	tumor necrosis factor receptor superfamily, member 25	NM_148965
211282_x_at	4.60453e-05	2.33147	TNFRSF25	tumor necrosis factor receptor superfamily, member 25	NM_148965
211841_s_at	0.000485334	2.30462	TNFRSF25	tumor necrosis factor receptor superfamily, member 25	NM_148965
219423_x_at	0.00565812	1.89349	TNFRSF25	tumor necrosis factor receptor superfamily, member 25	NM_148965
210847_x_at	0.0154759	1.69317	TNFRSF25	tumor necrosis factor receptor superfamily, member 25	NM_148965
202688_at	0.0011886	-2.23324	TNFSF10	tumor necrosis factor (ligand) superfamily, member 10	NM_003810
207216_at	0.00185661	1.77316	TNFSF8	tumor necrosis factor (ligand) superfamily, member 8	NM_001244
217149_x_at	0.00215626	1.52419	TNK1	tyrosine kinase, non-receptor, 1	AF097738
213201_s_at	0.000333252	-1.83916	TNNT1	troponin T type 1 (skeletal, slow)	AJ011712
208900_s_at	0.000745532	2.85731	TOP1	topoisomerase (DNA) I	J03250
201291_s_at	0.0139067	-1.74794	TOP2A	topoisomerase (DNA) II alpha 170kDa	AU159942
218459_at	0.00168816	-1.74177	TOR3A	torsin family 3, member A	NM_022371
217448_s_at	6.21966e-07	1.87838	TOX4	TOX high mobility group box family member 4	AL117508
201683_x_at	0.000370748	1.81015	TOX4	TOX high mobility group box family member 4	BE783632
211300_s_at	0.00700213	1.54156	TP53	tumor protein p53	K03199
210609_s_at	0.00207999	-2.14743	TP53I3	tumor protein p53 inducible protein 3	BC000474
213616_at	0.000399092	-1.80248	TPGS2	tubulin polyglutamylase complex subunit 2	BF063896
210986_s_at	0.00530639	-2.00651	TPM1	tropomyosin 1 (alpha)	Z24727
206116_s_at	0.00819809	-1.71853	TPM1	tropomyosin 1 (alpha)	NM_000366
210987_x_at	0.0155849	-1.67417	TPM1	tropomyosin 1 (alpha)	M19267
203671_at	0.00195548	-1.51417	TPMT	thiopurine S-methyltransferase	BF196891
214196_s_at	0.000272913	1.73932	TPP1	tripeptidyl peptidase I	AA602532
218876_at	0.00664922	-1.99018	TPPP3	tubulin polymerization-promoting protein family member 3	NM_016140
215220_s_at	5.14919e-05	4.3976	TPR	translocated promoter region, nuclear basket protein	AK023111
213575_at	5.28583e-05	1.52631	TRA2A	transformer 2 alpha homolog (Drosophila)	AW978896
209671_x_at	3.73462e-05	2.71695	TRAC	T cell receptor alpha constant	M12423
209670_at	0.000523888	2.03975	TRAC	T cell receptor alpha constant	M12959
210972_x_at	2.49917e-05	3.02645	TRAC///TRAJ17///TRAV20	T cell receptor alpha constant///T cell receptor alpha joining 17///T cell receptor alpha variable 20	M15565
215275_at	0.00747521	1.57262	TRAF3IP3	TRAF3 interacting protein 3	AW963138
211899_s_at	0.00130692	1.5425	TRAF4	TNF receptor-associated factor 4	AF082185
217056_at	0.00185627	1.65712	TRAJ20///TRAJ20///TRAV36DV7///TRAV36DV7	T cell receptor alpha joining 20///NULL///T cell receptor alpha variable 36/delta variable 7///NULL	X61070
201399_s_at	2.2345e-08	1.64749	TRAM1	translocation associated membrane protein 1	BC000687
210733_at	0.00206325	1.53936	TRAM1	translocation associated membrane protein 1	AF130055
217147_s_at	0.00519887	1.85511	TRAT1	T cell receptor associated transmembrane adaptor 1	AJ240085
217397_at	8.13207e-05	2.20604	TRAV10///TRAV10	T cell receptor alpha variable 10///NULL	AE000659
211667_x_at	0.00940544	1.50918	TRAV12-2	T cell receptor alpha variable 12-2	L34698
217394_at	5.97969e-05	4.10525	TRAV13-1///TRAV13-1	T cell receptor alpha variable 13-1///NULL	AE000659
215796_at	0.00194048	2.68175	TRAV13-2///TRAV13-2	T cell receptor alpha variable 13-2///NULL	BF976764
215769_at	8.71689e-05	1.59075	TRAV16///TRAV16	NULL///T cell receptor alpha variable 16	AW873544
216133_at	0.000109558	2.74434	TRAV21///TRAV21	T cell receptor alpha variable 21///NULL	AA284903
215540_at	0.000217514	1.89589	TRAV27///TRAV27	T cell receptor alpha variable 27///NULL	AW950865
215797_at	6.8838e-05	2.80857	TRAV8-3	T cell receptor alpha variable 8-3	AE000659
217170_at	0.000105849	2.22133	TRAV8-6///TRAV8-6	T cell receptor alpha variable 8-6///NULL	AE000659
217412_at	2.5206e-05	3.34538	TRAV9-2///TRAV9-2	T cell receptor alpha variable 9-2///NULL	AE000659
211796_s_at	0.00100355	1.57696	TRBC1	T cell receptor beta constant 1	AF043179
210915_x_at	0.000673732	1.573	TRBC1	T cell receptor beta constant 1	M15564
211608_at	0.0101161	1.62895	TRBV10-2///TRBV10-2	T cell receptor beta variable 10-2///NULL	U50073
216857_at	0.00635386	1.90353	TRBV21-1///TRBV21-1	T cell receptor beta variable 21-1 (pseudogene)///NULL	L48728
200990_at	3.10464e-05	1.95804	TRIM28	tripartite motif containing 28	NM_005762
219736_at	0.000550933	-1.68385	TRIM36	tripartite motif containing 36	NM_018700
221012_s_at	0.000707602	-1.72974	TRIM8	tripartite motif containing 8	NM_030912
216210_x_at	0.000179548	-1.72304	TRIOBP	TRIO and F-actin binding protein	AA046650
202795_x_at	1.94078e-05	-1.67628	TRIOBP	TRIO and F-actin binding protein	NM_007032
214908_s_at	2.35545e-05	1.56795	TRRAP	transformation/transcription domain-associated protein	AC004893
215111_s_at	0.00339931	-1.67892	TSC22D1	TSC22 domain family, member 1	AK027071
207001_x_at	0.00150993	2.33818	TSC22D3	TSC22 domain family, member 3	NM_004089
201513_at	4.58596e-06	-1.58986	TSN	translin	NM_004622
203227_s_at	0.000696127	-1.52194	TSPAN31	tetraspanin 31	AL514076
209263_x_at	0.0029508	-1.83311	TSPAN4	tetraspanin 4	BC000389
218012_at	0.00162177	1.71499	TSPYL2	TSPY-like 2	NM_022117
213122_at	0.00480931	-2.01315	TSPYL5	TSPY-like 5	AI096375
209605_at	0.00240919	-1.85648	TST	thiosulfate sulfurtransferase (rhodanese)	D87292
208664_s_at	0.00478352	1.77111	TTC3///TTC3P1	tetratricopeptide repeat domain 3///tetratricopeptide repeat domain 3 pseudogene 1	AU131711
208195_at	0.000928869	1.76646	TTN	titin	NM_003319
202476_s_at	4.21514e-05	1.57284	TUBGCP2	tubulin, gamma complex associated protein 2	BF002130
214007_s_at	2.70914e-06	2.44868	TWF1	twinfilin actin-binding protein 1	AW665024
214008_at	2.25381e-06	1.87073	TWF1	twinfilin actin-binding protein 1	N25562
219969_at	2.95477e-05	1.75358	TXLNG	taxilin gamma	NM_018360
216609_at	0.000554035	1.86387	TXN	thioredoxin	AF065241
202589_at	0.00863079	-1.94723	TYMS	thymidylate synthetase	NM_001071
218382_s_at	3.54589e-05	1.50025	U2AF2	U2 small nuclear RNA auxiliary factor 2	NM_007279
200964_at	0.00109275	1.69005	UBA1	ubiquitin-like modifier activating enzyme 1	NM_003334
201378_s_at	0.000904093	1.58695	UBAP2L	ubiquitin associated protein 2-like	NM_014847
209041_s_at	0.0013198	1.70141	UBE2G2	ubiquitin-conjugating enzyme E2G 2	BG395660
221962_s_at	0.00285308	1.56963	UBE2H	ubiquitin-conjugating enzyme E2H	AI829920
214881_s_at	0.000411885	1.65064	UBTF	upstream binding transcription factor, RNA polymerase I	X56687
212008_at	2.39611e-08	1.68039	UBXN4	UBX domain protein 4	N29889
220775_s_at	0.00656527	-1.67435	UEVLD	UEV and lactate/malate dehyrogenase domains	NM_018314
204881_s_at	0.00218339	1.6274	UGCG	UDP-glucose ceramide glucosyltransferase	NM_003358
204062_s_at	7.39706e-06	-1.91142	ULK2	unc-51-like kinase 2 (C. elegans)	BG526973
206771_at	0.000337737	-1.95752	UPK3A	uroplakin 3A	NM_006953
209136_s_at	0.000123578	1.64356	USP10	ubiquitin specific peptidase 10	BC000263
209137_s_at	0.0106689	1.57908	USP10	ubiquitin specific peptidase 10	BC000263
215886_x_at	0.00263786	1.58653	USP12	ubiquitin specific peptidase 12	AF022790
212065_s_at	0.00526385	1.5506	USP34	ubiquitin specific peptidase 34	AW502434
220370_s_at	0.00928267	1.79955	USP36	ubiquitin specific peptidase 36	NM_025090
222038_s_at	1.48116e-05	2.6202	UTP18	UTP18 small subunit (SSU) processome component homolog (yeast)	AA993099
207100_s_at	0.00689904	1.5072	VAMP1	vesicle-associated membrane protein 1 (synaptobrevin 1)	NM_016830
201556_s_at	0.0118057	1.51552	VAMP2	vesicle-associated membrane protein 2 (synaptobrevin 2)	BC002737
201336_at	0.00161603	-1.60022	VAMP3	vesicle-associated membrane protein 3	BC003570
204929_s_at	0.000124186	-1.70588	VAMP5	vesicle-associated membrane protein 5	NM_006634
219330_at	0.0106227	-1.71406	VANGL1	VANGL planar cell polarity protein 1	NM_024062
203940_s_at	0.0110425	-1.71421	VASH1	vasohibin 1	NM_014909
200931_s_at	0.00608621	-1.68302	VCL	vinculin	NM_014000
208844_at	0.000170344	2.60488	VDAC3	voltage-dependent anion channel 3	BC002456
207376_at	0.00801925	-1.53807	VENTX	VENT homeobox	NM_014468
205126_at	0.00311672	-1.59639	VRK2	vaccinia related kinase 2	NM_006296
219679_s_at	1.20656e-06	1.63392	WAC	WW domain containing adaptor with coiled-coil	NM_018604
217218_at	0.000177468	1.63086	WAPAL	wings apart-like homolog (Drosophila)	AK027005
200629_at	0.00313644	-2.73845	WARS	tryptophanyl-tRNA synthetase	NM_004184
210935_s_at	2.17819e-08	2.80136	WDR1	WD repeat domain 1	AF274954
218055_s_at	0.00636732	-1.55425	WDR41	WD repeat domain 41	NM_018268
65591_at	3.52099e-05	1.50552	WDR48	WD repeat domain 48	N64681
203827_at	0.000777808	-2.47707	WIPI1	WD repeat domain, phosphoinositide interacting 1	NM_017983
213836_s_at	0.00176634	-2.09939	WIPI1	WD repeat domain, phosphoinositide interacting 1	AW052084
213406_at	0.0104306	2.27076	WSB1	WD repeat and SOCS box containing 1	AA521269
201760_s_at	1.55837e-05	-1.5719	WSB2	WD repeat and SOCS box containing 2	NM_018639
214759_at	4.32305e-05	1.60359	WTAP	Wilms tumor 1 associated protein	AL583911
208459_s_at	6.79279e-07	1.53405	XPO7	exportin 7	NM_015024
210813_s_at	0.0110447	-1.53405	XRCC4	X-ray repair complementing defective repair in Chinese hamster cells 4	BC005259
211902_x_at	1.7583e-05	3.01456	YME1L1	YME1-like 1 ATPase	L34703
217063_x_at	0.000393226	1.84891	YME1L1	YME1-like 1 ATPase	X61079
200641_s_at	1.04652e-07	1.65186	YWHAZ	tyrosine 3-monooxygenase/tryptophan 5-monooxygenase activation protein, zeta polypeptide	BC003623
218833_at	0.000173704	-2.02061	ZAK	sterile alpha motif and leucine zipper containing kinase AZK	NM_016653
208087_s_at	0.000414737	-1.52301	ZBP1	Z-DNA binding protein 1	NM_030776
207164_s_at	0.00723196	1.58486	ZBTB18	zinc finger and BTB domain containing 18	NM_006352
222357_at	0.00175637	1.80036	ZBTB20	zinc finger and BTB domain containing 20	AW974823
205383_s_at	0.00101433	1.79019	ZBTB20	zinc finger and BTB domain containing 20	NM_015642
204182_s_at	0.00048946	-1.5478	ZBTB43	zinc finger and BTB domain containing 43	NM_014007
204180_s_at	0.00351745	-1.5212	ZBTB43	zinc finger and BTB domain containing 43	NM_014007
222082_at	0.00154297	1.94143	ZBTB7A	zinc finger and BTB domain containing 7A	AI568395
213299_at	2.90077e-06	1.86214	ZBTB7A	zinc finger and BTB domain containing 7A	AW027070
212423_at	8.54249e-05	-2.23138	ZCCHC24	zinc finger, CCHC domain containing 24	AK024784
217486_s_at	0.000209192	1.7163	ZDHHC17	zinc finger, DHHC-type containing 17	AF161412
218606_at	0.00179379	-1.74317	ZDHHC7	zinc finger, DHHC-type containing 7	NM_017740
202448_s_at	0.00206232	1.55979	ZER1	zyg-11 related, cell cycle regulator	BE675849
201367_s_at	1.70351e-06	10.7616	ZFP36L2	ZFP36 ring finger protein-like 2	AI356398
201369_s_at	0.00880767	2.24017	ZFP36L2	ZFP36 ring finger protein-like 2	NM_006887
33148_at	0.000432612	2.19118	ZFR	zinc finger RNA binding protein	NM_016107
213286_at	0.000231979	2.01807	ZFR	zinc finger RNA binding protein	NM_016107
217176_s_at	0.00473524	1.57973	ZFX	zinc finger protein, X-linked	X59740
203651_at	0.00042323	-1.53759	ZFYVE16	zinc finger, FYVE domain containing 16	NM_014733
214900_at	0.000147736	1.66437	ZKSCAN1	zinc finger with KRAB and SCAN domains 1	AC004522
217781_s_at	0.000503347	-1.74503	ZNF106	zinc finger protein 106	AI493587
205739_x_at	0.000411432	1.71711	ZNF107	zinc finger protein 107	NM_016220
216677_at	6.28243e-05	1.5173	ZNF154	zinc finger protein 154	U20648
203585_at	0.00921938	-2.37296	ZNF185	zinc finger protein 185 (LIM domain)	NM_007150
206900_x_at	0.00248051	1.55105	ZNF253	zinc finger protein 253	NM_021047
205917_at	0.0133574	-1.53326	ZNF264	zinc finger protein 264	NM_003417
220250_at	0.000166084	1.67853	ZNF286A	zinc finger protein 286A	NM_020652
205427_at	1.08273e-05	-2.0935	ZNF354A	zinc finger protein 354A	NM_005649
222283_at	9.49666e-06	3.00815	ZNF480	zinc finger protein 480	BG387770
203604_at	0.00363376	-1.62151	ZNF516	zinc finger protein 516	N38750
215019_x_at	5.1714e-05	1.55443	ZNF528	zinc finger protein 528	AW474158
215124_at	0.00207272	1.50129	ZNF550	zinc finger protein 550	BE886287
205594_at	1.09548e-05	-1.98371	ZNF652	zinc finger protein 652	NM_014897
217547_x_at	7.94649e-05	1.73086	ZNF675	zinc finger protein 675	BF308250
206180_x_at	1.49147e-05	1.57561	ZNF747	zinc finger protein 747	NM_023931
218916_at	0.000398461	-1.53863	ZNF768	zinc finger protein 768	NM_024671
215570_s_at	0.00671291	1.62079	ZNF780A///ZNF780B	zinc finger protein 780A///zinc finger protein 780B	AC005614
215758_x_at	3.64933e-05	1.61112	ZNF93	zinc finger protein 93	AC007204
218312_s_at	0.0128596	1.58011	ZSCAN18	zinc finger and SCAN domain containing 18	NM_023926
222378_at	1.46947e-05	5.22352			AW973791
211973_at	3.31513e-06	3.33327			AW341200
214405_at	9.28733e-06	3.22748			Z39557
222330_at	0.000652983	3.10202			AW974995
215221_at	0.000105328	2.72156			AK025064
222326_at	0.00376923	2.53919			AW973834
AFFX-BioC-3_at	8.05846e-08	-2.20224			AFFX-BioC-3
AFFX-r2-Ec-bioC-3_at	1.25263e-08	-2.1239			AFFX-r2-Ec-bioC-3
AFFX-BioB-M_at	1.63735e-06	-2.11035			AFFX-BioB-M
213655_at	0.0020419	-2.10539			AA502643
215528_at	0.00104889	2.09916			AL049390
217300_at	0.00480496	2.09727			U80771
AFFX-BioB-3_at	3.97641e-06	-2.09668			AFFX-BioB-3
AFFX-r2-Ec-bioB-5_at	6.36016e-07	-2.06848			AFFX-r2-Ec-bioB-5
215846_at	0.00738555	2.06004			AL117571
210098_s_at	0.000141217	2.03468			AF130102
AFFX-r2-Ec-bioB-M_at	1.32811e-07	-2.02969			AFFX-r2-Ec-bioB-M
AFFX-r2-Bs-phe-5_at	0.000558559	-1.9773			AFFX-r2-Bs-phe-5
AFFX-BioB-5_at	2.88034e-07	-1.96669			AFFX-BioB-5
AFFX-M27830_5_at	4.84234e-05	1.95672			AFFX-M27830_5
AFFX-BioC-5_at	9.68301e-08	-1.95445			AFFX-BioC-5
213642_at	0.000491932	1.92867			BE312027
AFFX-HUMRGE/M10098_M_at	7.47784e-06	1.89801			AFFX-HUMRGE/M10098_M
AFFX-r2-Bs-lys-M_at	0.00106968	-1.8837			AFFX-r2-Bs-lys-M
AFFX-r2-Ec-bioC-5_at	2.70183e-07	-1.8741			AFFX-r2-Ec-bioC-5
AFFX-r2-Bs-lys-5_at	0.00168083	-1.8636			AFFX-r2-Bs-lys-5
217137_x_at	0.000242806	1.82202			K00627
213156_at	0.00390352	1.81963			BG251521
AFFX-r2-Ec-bioB-3_at	3.91958e-07	-1.81662			AFFX-r2-Ec-bioB-3
AFFX-LysX-5_at	0.000312319	-1.77612			AFFX-LysX-5
AFFX-r2-Bs-lys-3_at	0.00128463	-1.7614			AFFX-r2-Bs-lys-3
209535_s_at	0.000458146	-1.72578			AF127481
206532_at	2.97509e-05	1.72534			NM_003073
217328_at	0.00143234	1.72306			AF009787
216246_at	0.00306344	1.71186			AF113008
220814_at	0.00214862	1.69725			NM_017964
213757_at	0.00235524	-1.69463			AA393940
215902_at	8.39974e-05	1.67826			AF009267
AFFX-LysX-M_at	0.00263731	-1.67786			AFFX-LysX-M
AFFX-PheX-5_at	0.000914548	-1.66189			AFFX-PheX-5
216101_at	0.00313534	1.65471			AL049242
215586_at	0.00421925	-1.65059			AK024173
217374_x_at	0.00138353	1.6399			AC006033
AFFX-r2-Bs-phe-M_at	0.00393675	-1.62509			AFFX-r2-Bs-phe-M
213872_at	8.18675e-07	1.61438			BE465032
AFFX-PheX-M_at	0.00145407	-1.60862			AFFX-PheX-M
AFFX-r2-Bs-thr-3_s_at	0.00110737	-1.604			AFFX-r2-Bs-thr-3
213813_x_at	0.00170801	1.59617			AI345238
AFFX-LysX-3_at	0.00230767	-1.58966			AFFX-LysX-3
222062_at	0.0139278	-1.58805			AI983115
217051_s_at	8.78122e-08	1.58492			AF257501
212605_s_at	1.07361e-05	-1.58096			AK025759
216173_at	0.00756289	-1.579			AK025360
217629_at	0.00687991	-1.578			AA365670
215745_at	5.32227e-05	1.57529			L34409
207688_s_at	0.00355408	1.57425			NM_005538
222368_at	3.56409e-05	1.56894			AW972351
213605_s_at	0.0141705	1.56407			AL049987
217536_x_at	0.0133466	-1.54111			M78162
217604_at	0.000263999	-1.53183			AI086530
220874_at	0.000354188	1.53068			NM_018575
216766_at	0.00270832	-1.52818			AK025152
213879_at	0.000331149	1.5016			AV726646
AFFX-r2-Bs-phe-3_at	0.00279793	-1.49953			AFFX-r2-Bs-phe-3
tolti tutti gli up/down
