# Supplementary material for: Immune Response to Rotavirus and Gluten Sensitivity
Source: J Immunol Res. 2018 Mar 15;2018:9419204. doi: 10.1155/2018/9419204 (PMC5875030; doi:10.1155/2018/9419204)
Supplement: Supplementary 3 — Additional Table 3: GO terms containing the words “virus” and “viral” to which are associated genes modulated in the three datasets. [file 9419204.f3.xls]

## Sheet: Foglio1
Biological processes connected to viral infection in wich are involved genes modulated in the three datasets
GLUTEN SENSITIVITY			ROTAVIRUS INFECTION
viral process			viral process
regulation of viral process			regulation of viral process
modulation by host of viral process			modulation by host of viral process
positive regulation of viral process			positive regulation of viral process
negative regulation of viral process			negative regulation of viral process
positive regulation by host of viral process			positive regulation by host of viral process
viral life cycle			viral life cycle
regulation of viral life cycle			regulation of viral life cycle
positive regulation of viral life cycle			positive regulation of viral life cycle
negative regulation of viral life cycle			negative regulation of viral life cycle
viral genome replication			viral genome replication
regulation of viral genome replication			regulation of viral genome replication
positive regulation of viral genome replication			positive regulation of viral genome replication
negative regulation of viral genome replication			negative regulation of viral genome replication
negative regulation of single stranded viral RNA replication via double stranded DNA intermediate			negative regulation of single stranded viral RNA replication via double stranded DNA intermediate
modulation by host of viral genome replication			modulation by host of viral genome replication
positive regulation by host of viral genome replication			positive regulation by host of viral genome replication
viral budding			viral budding
viral budding via host ESCRT complex			viral budding via host ESCRT complex
viral RNA genome replication			viral RNA genome replication
viral gene expression			viral gene expression
viral transcription			viral transcription
regulation of viral transcription			regulation of viral transcription
positive regulation of viral transcription			positive regulation of viral transcription
negative regulation of viral transcription			negative regulation of viral transcription
modulation by host of viral molecular function			modulation by host of viral molecular function
modulation by host of viral transcription			modulation by host of viral transcription
negative regulation by host of viral transcription			negative regulation by host of viral transcription
positive regulation by host of viral transcription			positive regulation by host of viral transcription
modulation by host of RNA binding by virus			modulation by host of RNA binding by virus
modulation by host of viral RNA-binding transcription factor activity			modulation by host of viral RNA-binding transcription factor activity
viral entry into host cell			viral entry into host cell
regulation of viral entry into host cell			regulation of viral entry into host cell
negative regulation of viral entry into host cell			negative regulation of viral entry into host cell
positive regulation of viral entry into host cell			positive regulation of viral entry into host cell
positive regulation of viral release from host cell			positive regulation of viral release from host cell
regulation of viral release from host cell			regulation of viral release from host cell
intracellular transport of virus (GO:0075733)			intracellular transport of virus
response to virus			response to virus
cellular response to virus			cellular response to virus
defense response to virus			defense response to virus
regulation of defense response to virus (GO:0050688)			regulation of defense response to virus
negative regulation of defense response to virus (GO:0050687)			negative regulation of defense response to virus
regulation of defense response to virus by virus			regulation of defense response to virus by virus
regulation of defense response to virus by host (GO:0050691)			regulation of defense response to virus by host (GO:0050691)
cytoplasmic pattern recognition receptor signaling pathway in response to virus (GO:0039528)			cytoplasmic pattern recognition receptor signaling pathway
cellular process regulating host cell cycle in response to virus (GO:0060154)			cellular process regulating host cell cycle in response to virus
modulation by virus of host morphology or physiology			modulation by virus of host morphology or physiology
positive regulation of apoptotic process by virus (GO:0060139)			positive regulation of apoptotic process by virus
			suppression by virus of host apoptotic process
viral RNA genome packaging			transport of virus
viral genome packaging			modulation by virus of host transcription
negative regulation by virus of viral protein levels in host cell			modulation by virus of host gene expression
regulation by virus of viral protein levels in host cell (GO:0046719)			positive regulation of defense response to virus by host
regulation by virus of viral protein levels in host cell
cytoplasmic pattern recognition receptor signaling pathway in response to virus
receptor-mediated endocytosis of virus by host cell (GO:0019065)
evasion or tolerance of host defenses by virus (GO:0019049)
detection of virus (GO:0009597)
T84 TREATED CELLS
viral process
modulation by host of viral RNA-binding transcription factor activity
modulation by host of viral RNA-binding transcription factor activity
modulation by host of viral transcription
regulation of viral transcription
regulation of viral process
modulation by host of viral molecular function
modulation by host of viral process
modulation by host of viral RNA genome replication
modulation by host of viral genome replication
regulation of viral genome replication
regulation of viral life cycle
negative regulation by host of viral release from host cell
negative regulation by host of viral process
negative regulation of viral process
modulation by host of viral release from host cell
regulation of viral release from host cell
negative regulation of viral release from host cell
negative regulation of viral life cycle
positive regulation of intracellular transport of viral material
regulation of intracellular transport of viral material
positive regulation of viral life cycle
positive regulation of viral process
negative regulation by virus of viral protein levels in host cell
regulation by virus of viral protein levels in host cell
ly viral transcription
viral transcription
viral gene expression
viral release from host cell
viral life cycle
negative regulation by host of viral glycoprotein metabolic process
modulation by host of viral glycoprotein metabolic process
positive regulation by host of viral genome replication
positive regulation by host of viral process
positive regulation of viral genome replication
negative regulation by host of viral transcription
negative regulation of viral transcription
positive regulation by host of viral transcription
positive regulation of viral transcription
endocytosis involved in viral entry into host cell
viral entry into host cell
intracellular transport of viral protein in host cell
positive regulation by host of viral release from host cell
positive regulation of viral release from host cell
negative stranded viral RNA replication
viral RNA genome replication
viral genome replication
negative regulation of viral entry into host cell
regulation of viral entry into host cell
late viral transcription
regulation of viral-induced cytoplasmic pattern recognition receptor signaling pathway
positive regulation of viral entry into host cell
negative regulation by host of viral genome replication
negative regulation of viral genome replication
viral mRNA export from host cell nucleus
IRES-dependent viral translational initiation
viral translation
viral budding via host ESCRT complex
viral budding
modulation by host of RNA binding by virus
modulation by virus of host transcription
modulation by virus of host gene expression
modulation by symbiont of host transcription
suppression by virus of host apoptotic process
modulation by virus of host apoptotic process
uppression by virus of host molecular function
modulation by virus of host molecular function
negative regulation by virus of viral protein levels in host cell
regulation by virus of viral protein levels in host cell
cellular process regulating host cell cycle in response to virus
cellular response to virus
response to virus
detection of virus
negative regulation of defense response to virus by host
negative regulation of defense response to virus
regulation of defense response to virus
regulation of defense response to virus by host
active induction of host immune response by virus
induction of host immune response by virus
defense response to virus
positive regulation of defense response to virus by host
evasion or tolerance of host defenses by virus
regulation of defense response to virus by virus
